# Supplementary material for: Aligned macrocycle pores in ultrathin films for accurate molecular sieving
Source: PubMed Central journal article supplement (PMC9433321; doi:10.1038/s41586-022-05032-1), 2022-08-31
Supplement: 41586_2022_5032_MOESM1_ESM.pdf [file 41586_2022_5032_MOESM1_ESM.pdf]

## Supplementary information

---

# Aligned macrocycle pores in ultrathin films for accurate molecular sieving

---

In the format provided by the authors and unedited

## *Supplementary Information*

### **Aligned macrocycle pores in ultrathin films for accurate molecular sieving**

Zhiwei Jiang<sup>1,2,7</sup>, Ruijiao Dong<sup>1,3,7</sup>, Austin M. Evans<sup>4,5</sup>, Niklas Biere<sup>6</sup>, Mahmood A. Ebrahim<sup>1</sup>, Siyao Li<sup>1</sup>, Dario Anselmetti<sup>6</sup>, William R. Dichtel<sup>4</sup>, Andrew G. Livingston<sup>1,2\*</sup>

5 **Affiliations:**

<sup>1</sup>Barrer Centre, Department of Chemical Engineering, Imperial College London, South Kensington Campus, London SW7 2AZ, UK.

<sup>2</sup>Department of Engineering and Materials Science, Queen Mary University of London, Mile End Road, London E1 4NS, UK.

10 <sup>3</sup>Shanghai Centre for Systems Biomedicine, Key Laboratory of Systems Biomedicine (Ministry of Education), Shanghai Jiao Tong University, Shanghai, 200240, China.

<sup>4</sup>Department of Chemistry, Northwestern University, Evanston, IL 60208, USA.

<sup>5</sup>George & Josephine Butler Polymer Research Laboratory, Center for Macromolecular Science & Engineering, Department of Chemistry, University of Florida, Gainesville, FL 32611, USA.

15 <sup>6</sup>Experimental Biophysics and Applied Nanoscience, Faculty of Physics, Bielefeld University, 33615 Bielefeld, Germany.

<sup>7</sup>These authors contributed equally to this work.

\*Correspondence to: a.livingston@qmul.ac.uk

20

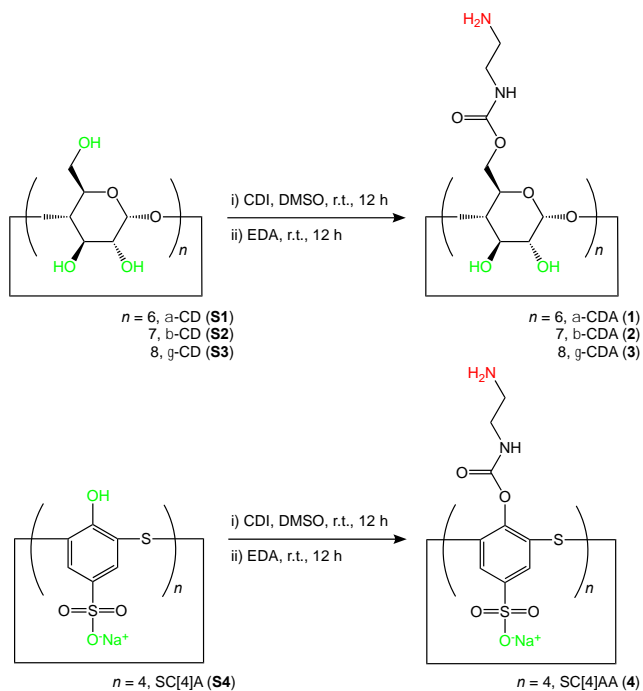

**Supplementary Figure 1 | Synthesis of amino-functionalised macrocyclic derivatives including  $\alpha$ -CDA (1),  $\beta$ -CDA (2),  $\gamma$ -CDA (3), and SC[4]AA (4).**

**NMR spectra**

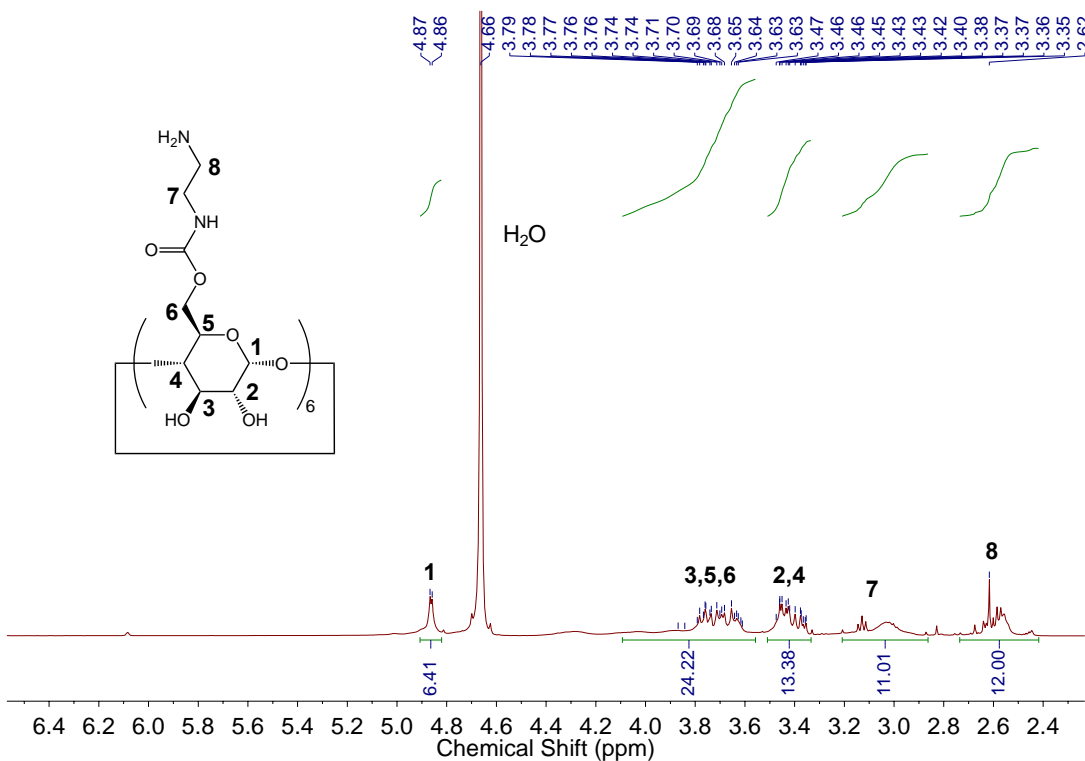

5

**Supplementary Figure 2 | <sup>1</sup>H NMR spectrum of  $\alpha$ -CDA (1) in D<sub>2</sub>O.**

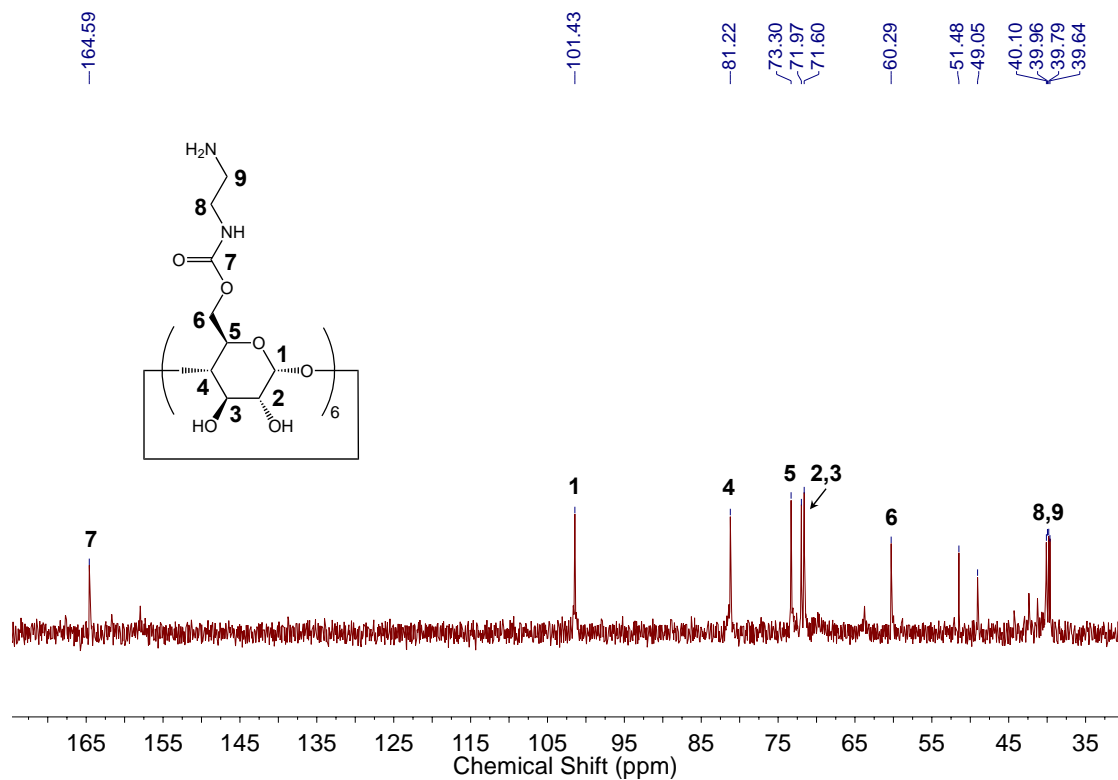

Supplementary Figure 3 |  $^{13}\text{C}$  NMR spectrum of  $\alpha$ -CDA (1) in  $\text{D}_2\text{O}$ .

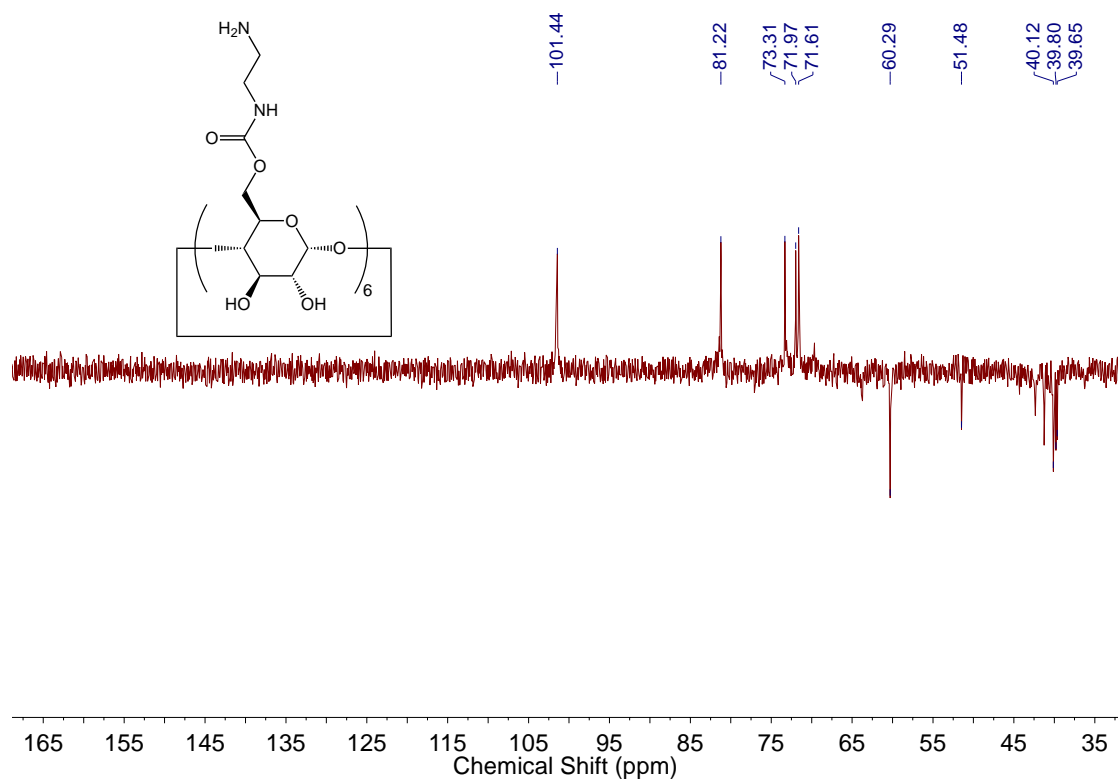

Supplementary Figure 4 |  $^{13}\text{C}$  DEPT-135 NMR spectrum of  $\alpha$ -CDA (1) in  $\text{D}_2\text{O}$ .

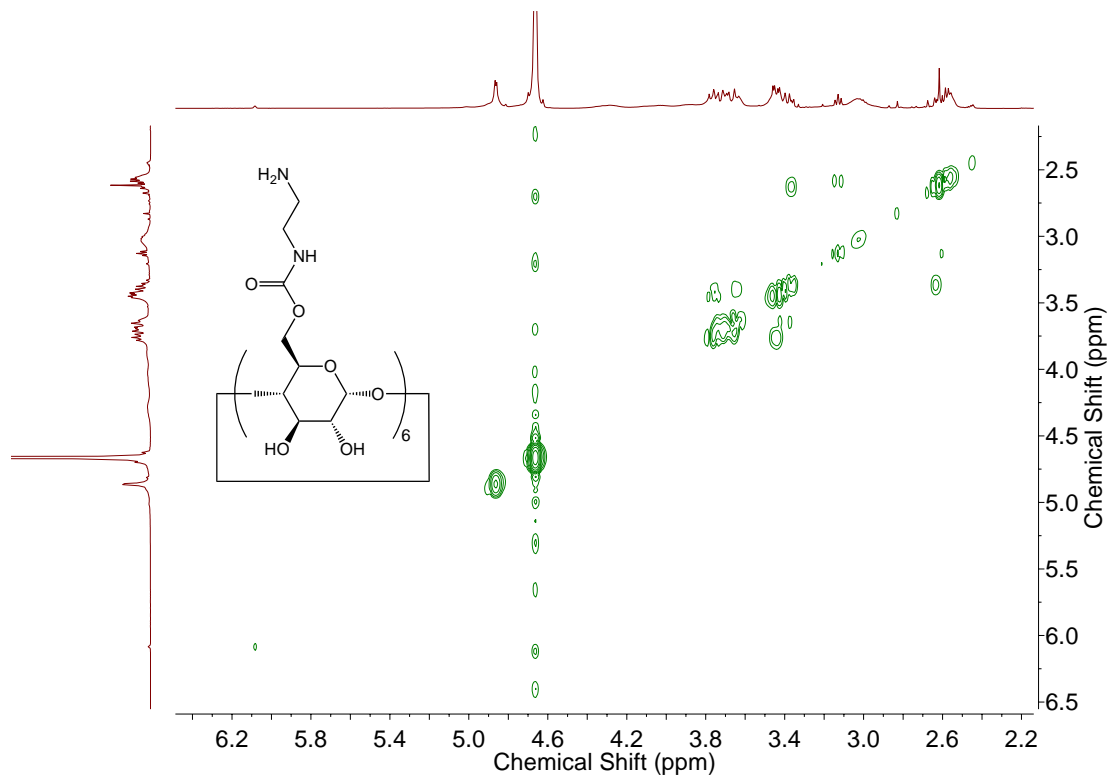

Supplementary Figure 5 | 2D  $^1\text{H}$ - $^1\text{H}$  COSY NMR spectrum of  $\alpha$ -CDA (1) in  $\text{D}_2\text{O}$ .

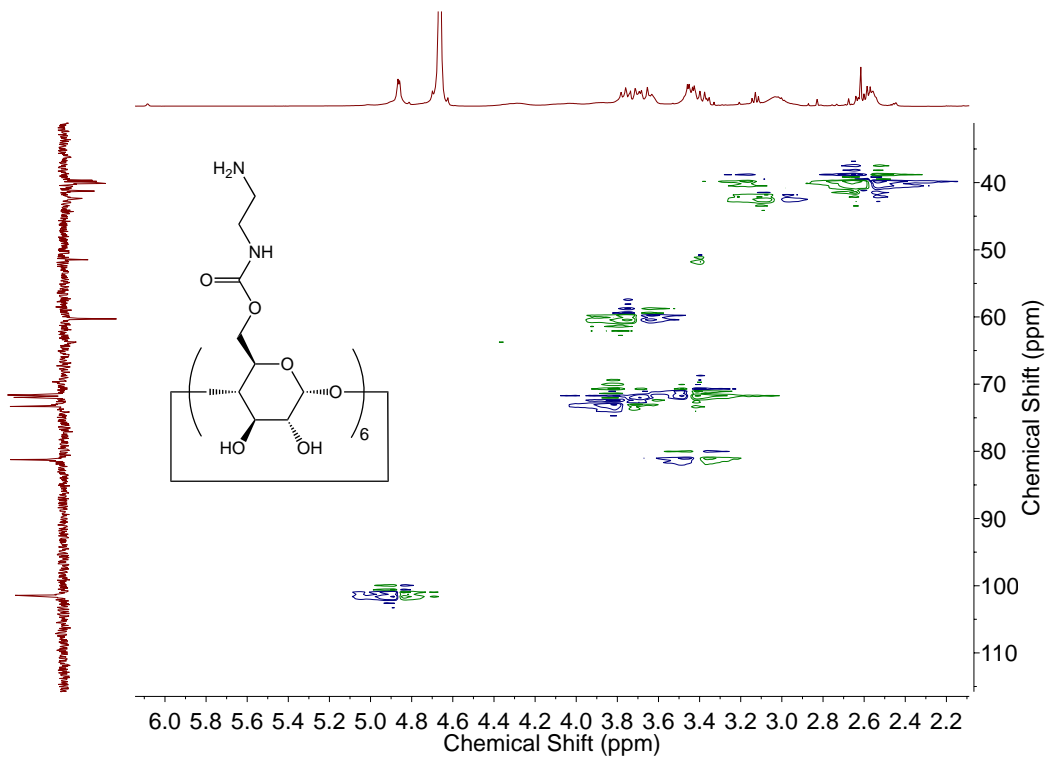

Supplementary Figure 6 | 2D  $^1\text{H}$ - $^{13}\text{C}$  HSQC NMR spectrum of  $\alpha$ -CDA (1) in  $\text{D}_2\text{O}$ .

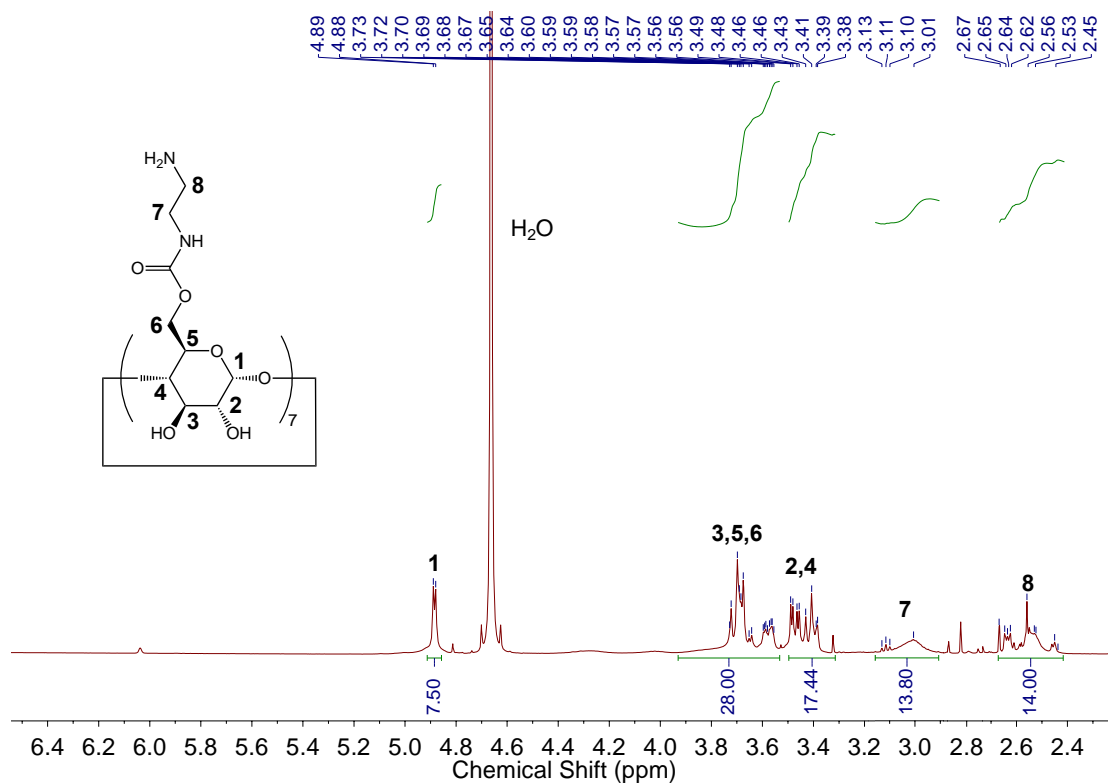

Supplementary Figure 7 | <sup>1</sup>H NMR spectrum of  $\beta$ -CDA (2) in D<sub>2</sub>O.

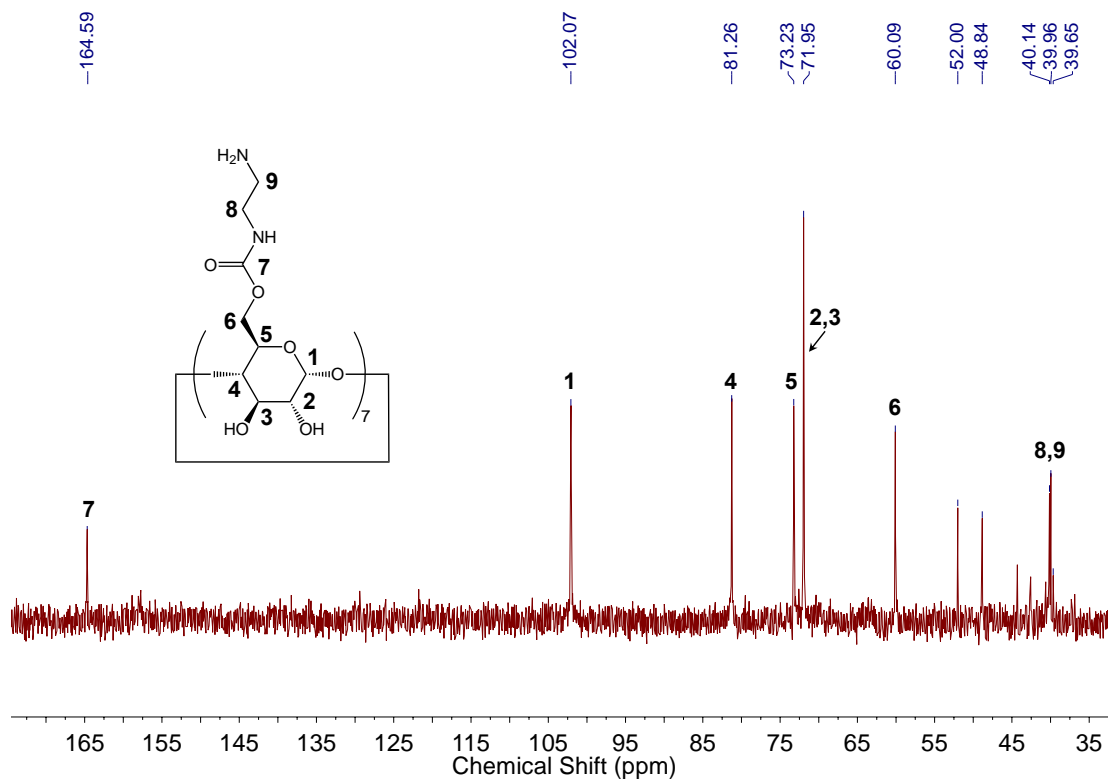

Supplementary Figure 8 | <sup>13</sup>C NMR spectrum of  $\beta$ -CDA (2) in D<sub>2</sub>O.

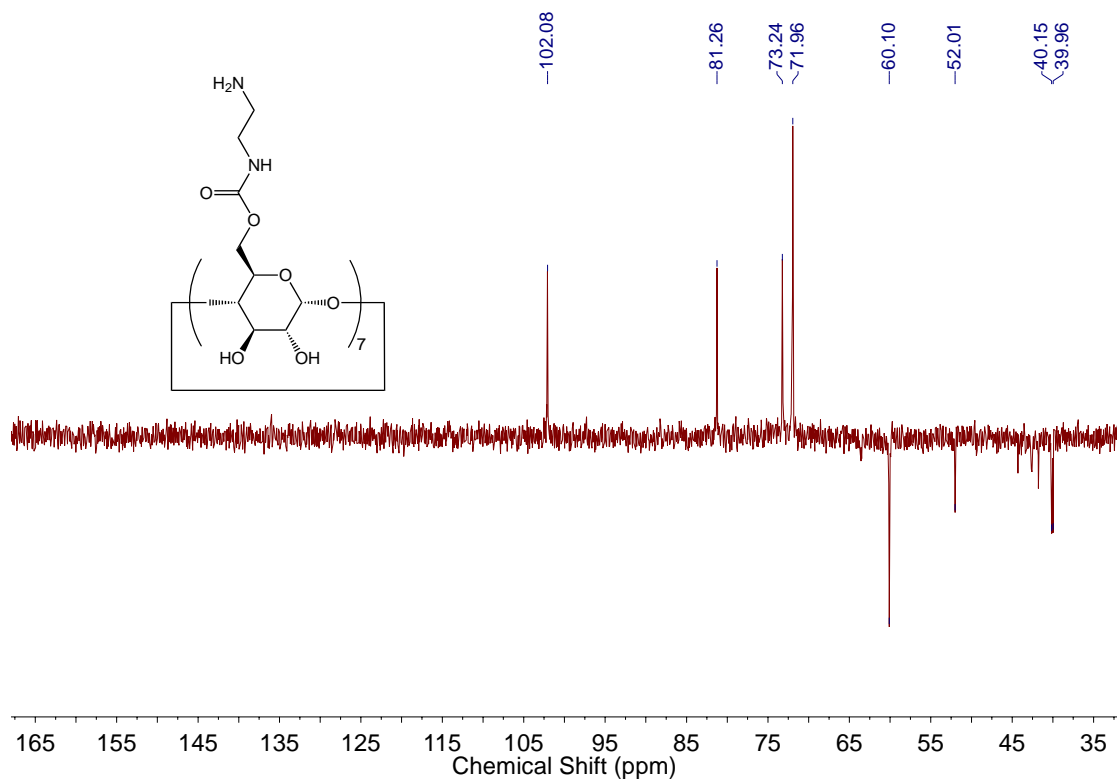

Supplementary Figure 9 |  $^{13}\text{C}$  DEPT-135 NMR spectrum of  $\beta$ -CDA (2) in  $\text{D}_2\text{O}$ .

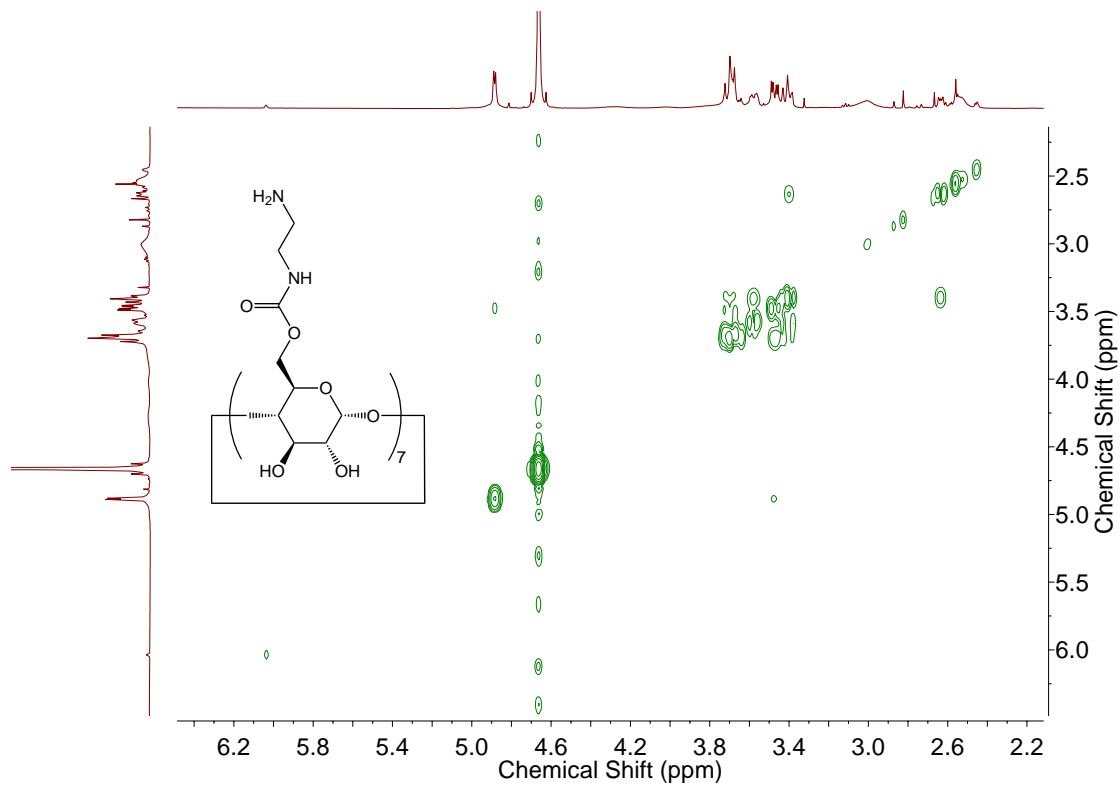

Supplementary Figure 10 |  $^2\text{D } ^1\text{H}-^1\text{H}$  COSY NMR spectrum of  $\beta$ -CDA (2) in  $\text{D}_2\text{O}$ .

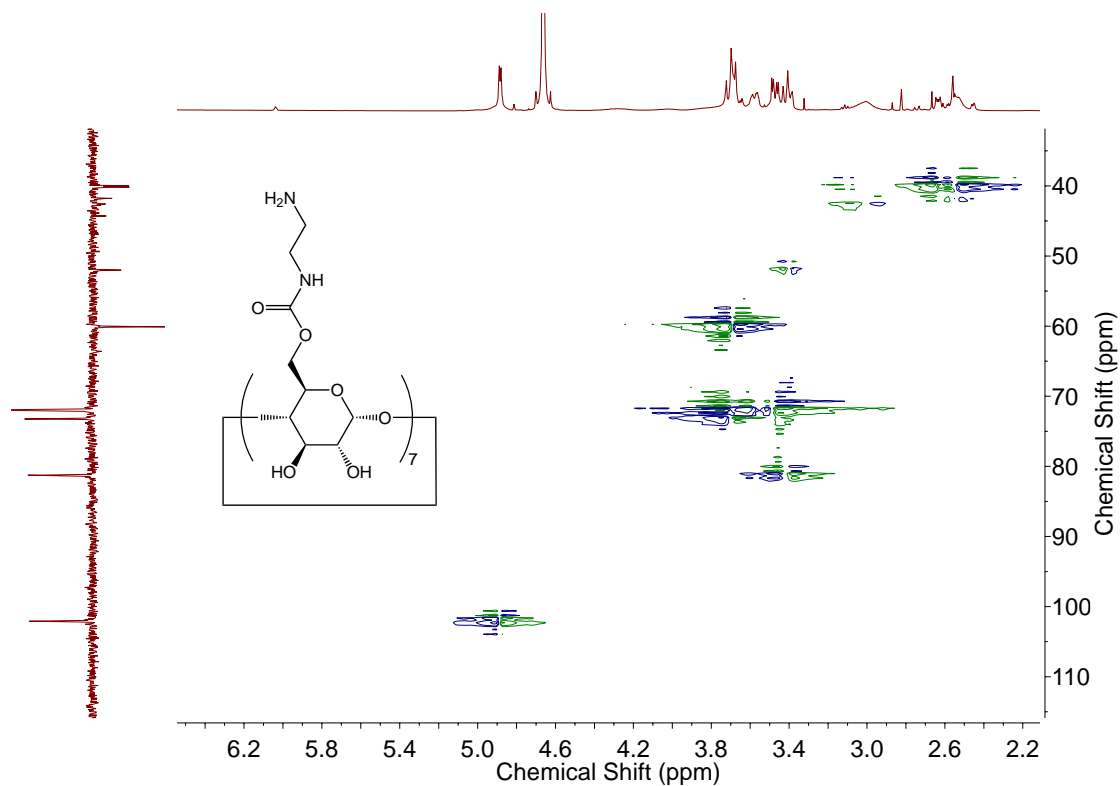

Supplementary Figure 11 | 2D  $^1\text{H}$ - $^{13}\text{C}$  HSQC NMR spectrum of  $\beta$ -CDA (2) in  $\text{D}_2\text{O}$ .

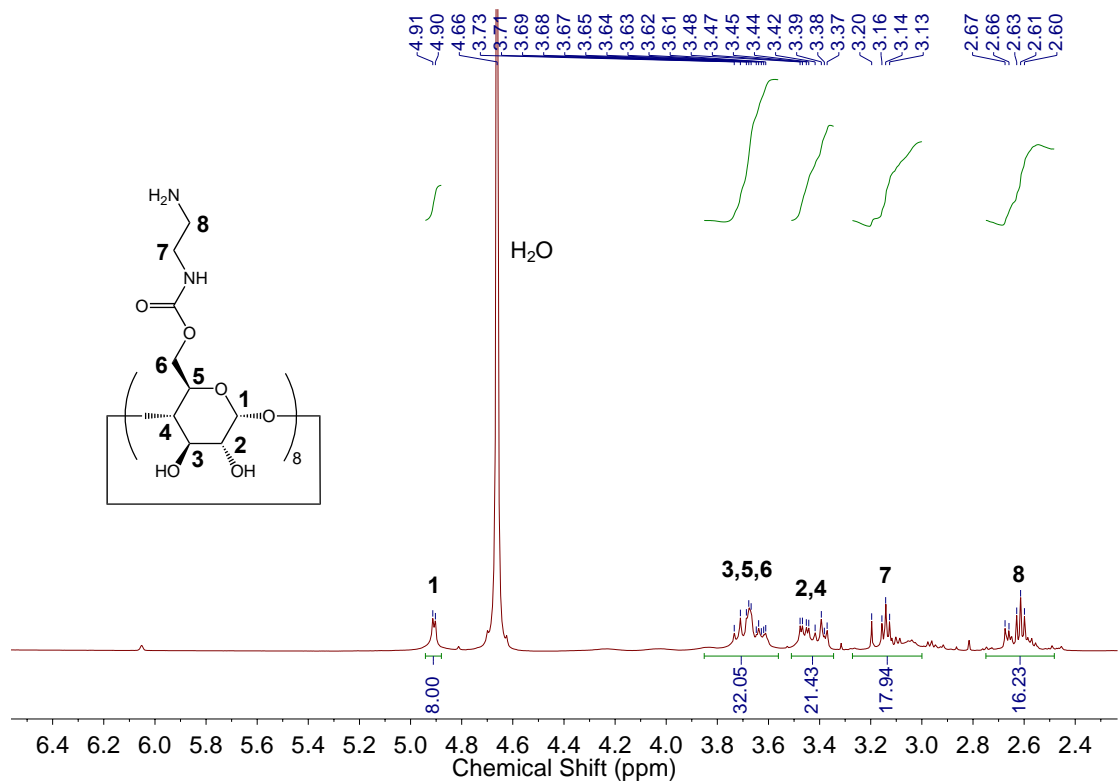

Supplementary Figure 12 |  $^1\text{H}$  NMR spectrum of  $\gamma$ -CDA (3) in  $\text{D}_2\text{O}$ .



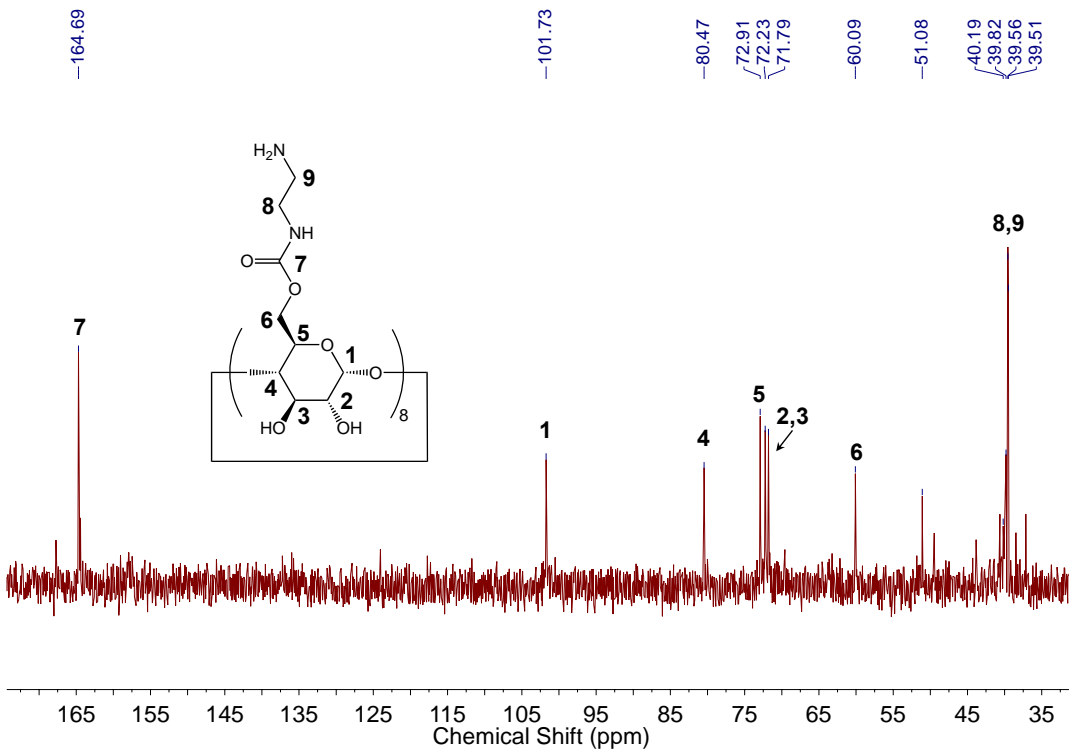

Supplementary Figure 13 |  $^{13}\text{C}$  NMR spectrum of  $\gamma$ -CDA (3) in  $\text{D}_2\text{O}$ .

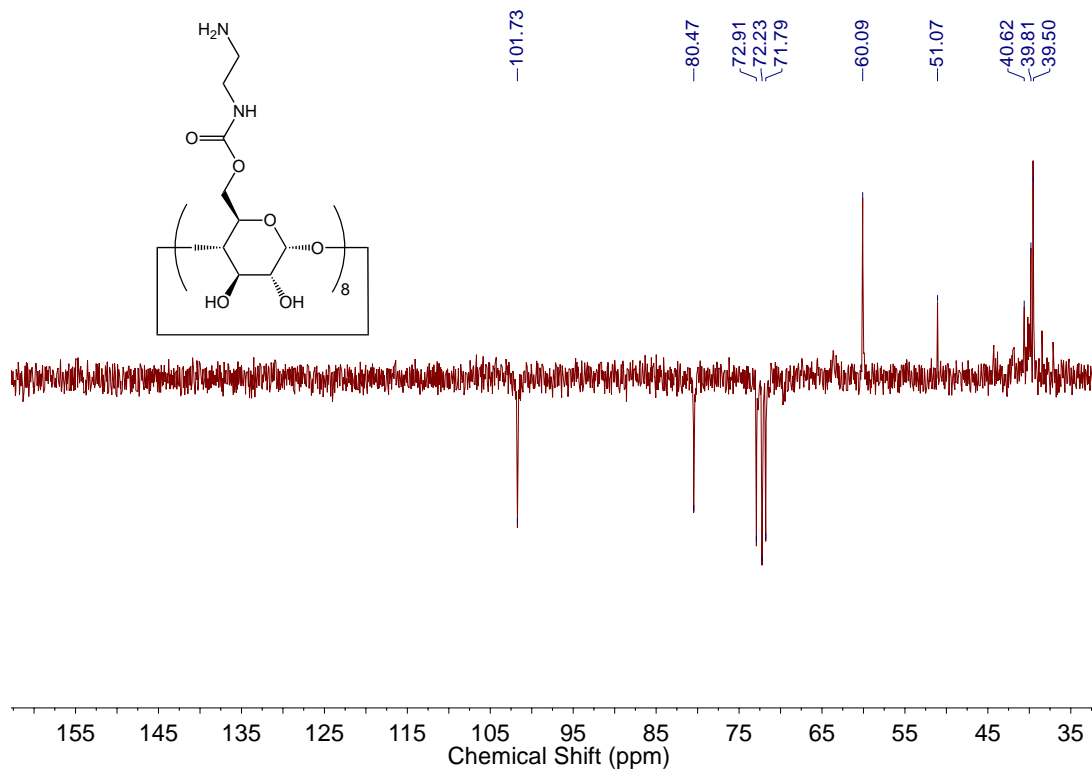

Supplementary Figure 14 |  $^{13}\text{C}$  DEPT-135 NMR spectrum of  $\gamma$ -CDA (3) in  $\text{D}_2\text{O}$ .

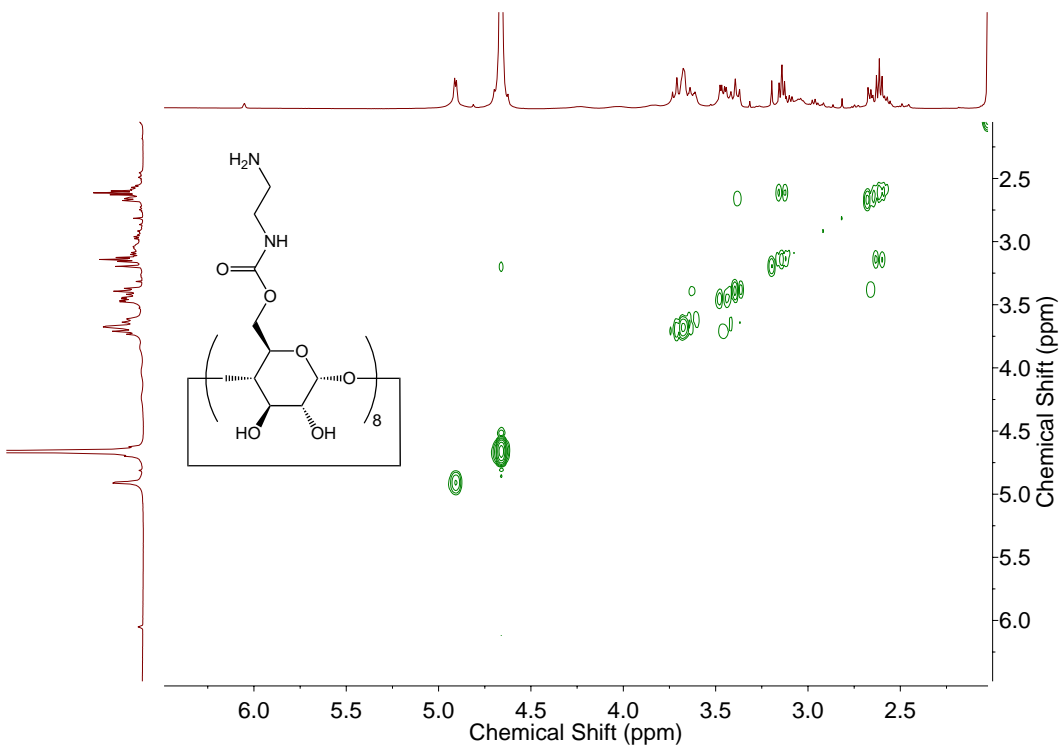

Supplementary Figure 15 | 2D  $^1\text{H}$ - $^1\text{H}$  COSY NMR spectrum of  $\gamma$ -CDA (3) in  $\text{D}_2\text{O}$ .

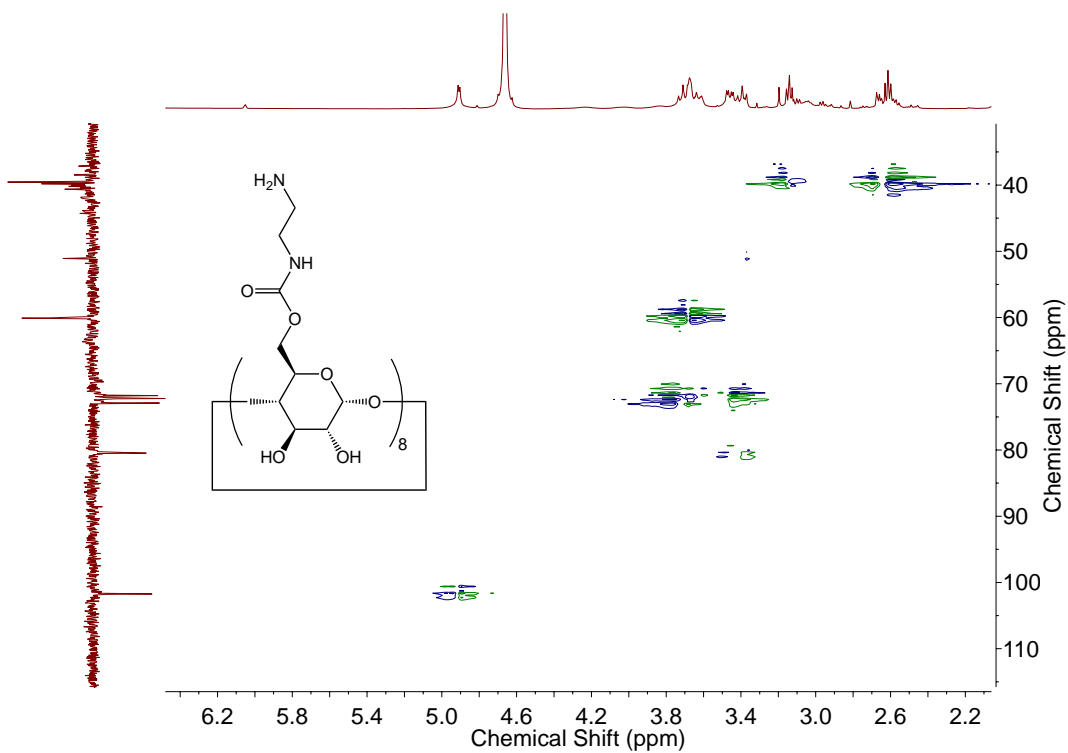

Supplementary Figure 16 | 2D  $^1\text{H}$ - $^{13}\text{C}$  HSQC NMR spectrum of  $\gamma$ -CDA (3) in  $\text{D}_2\text{O}$ .

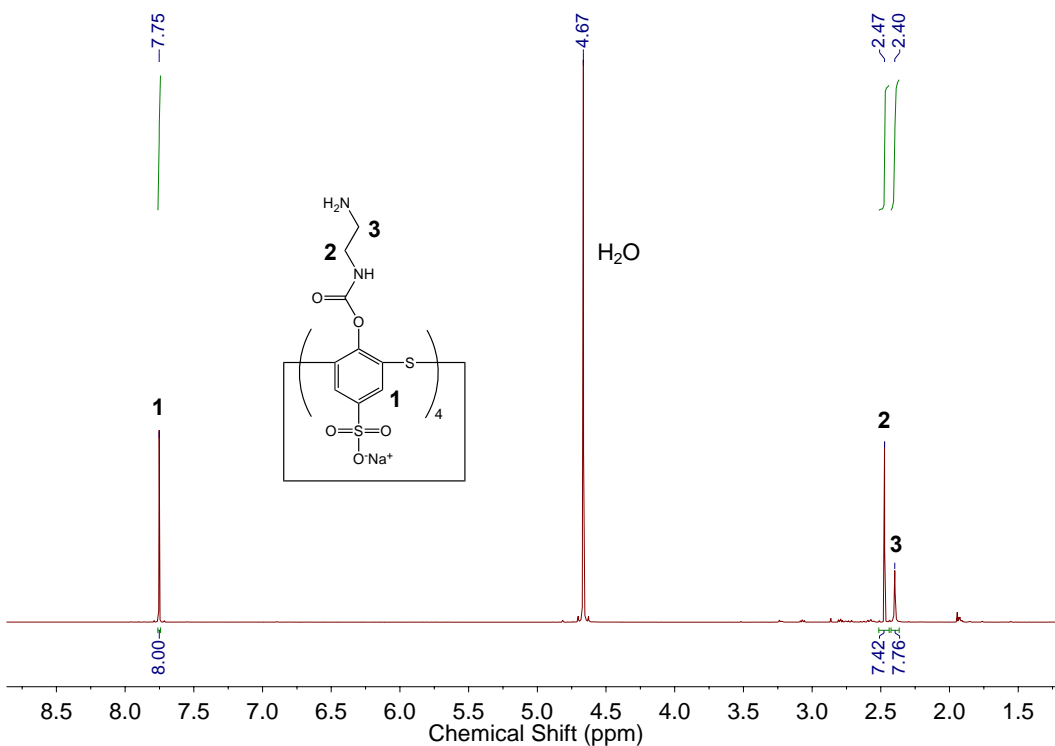

**Supplementary Figure 17 |  $^1\text{H}$  NMR spectrum of SC[4]AA (4) in  $\text{D}_2\text{O}$ .**

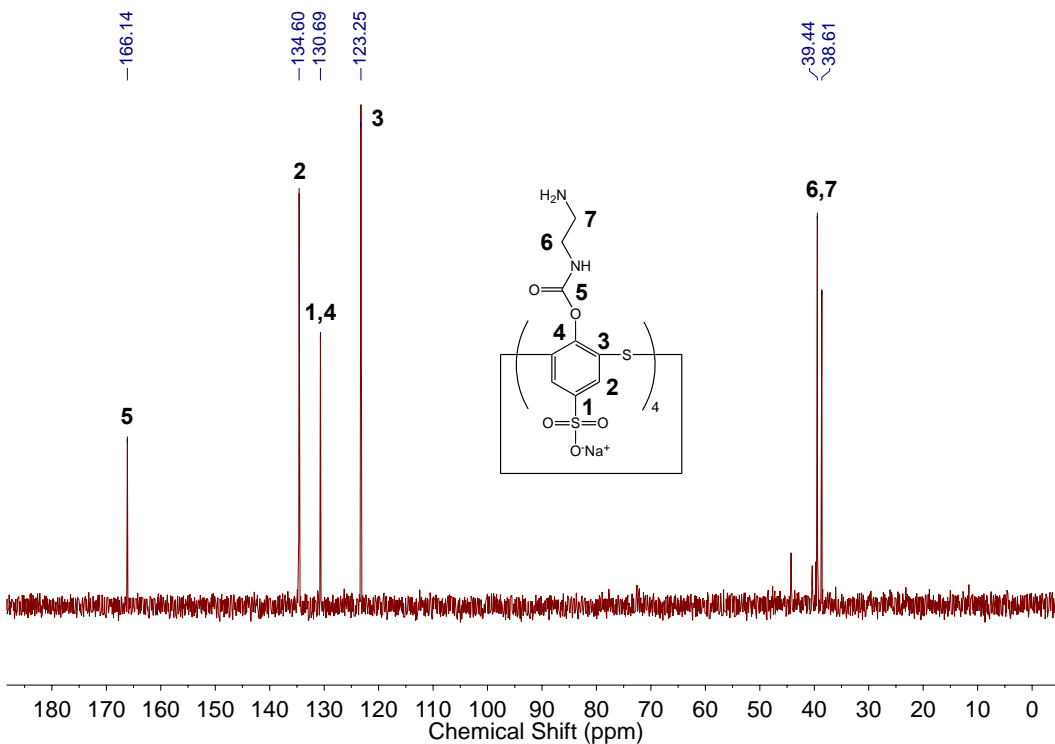

**Supplementary Figure 18 |  $^{13}\text{C}$  NMR spectrum of SC[4]AA (4) in  $\text{D}_2\text{O}$ .**

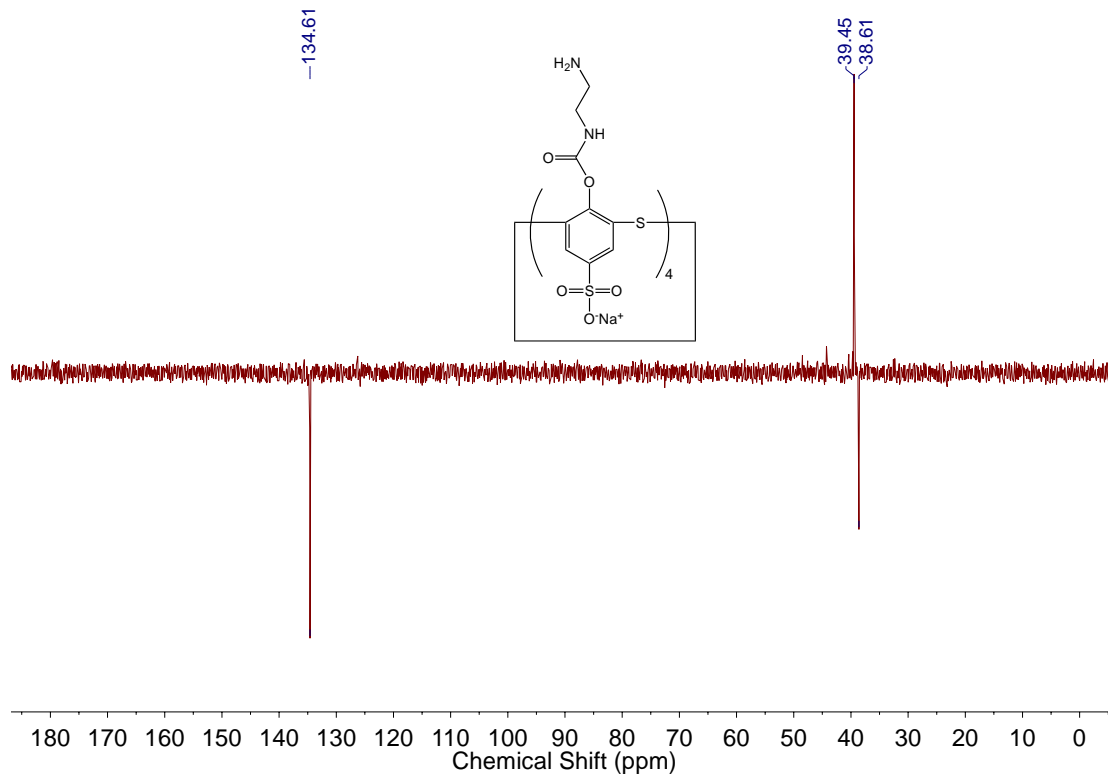

Supplementary Figure 19 |  $^{13}\text{C}$  DEPT-135 NMR spectrum of SC[4]AA (4) in  $\text{D}_2\text{O}$ .

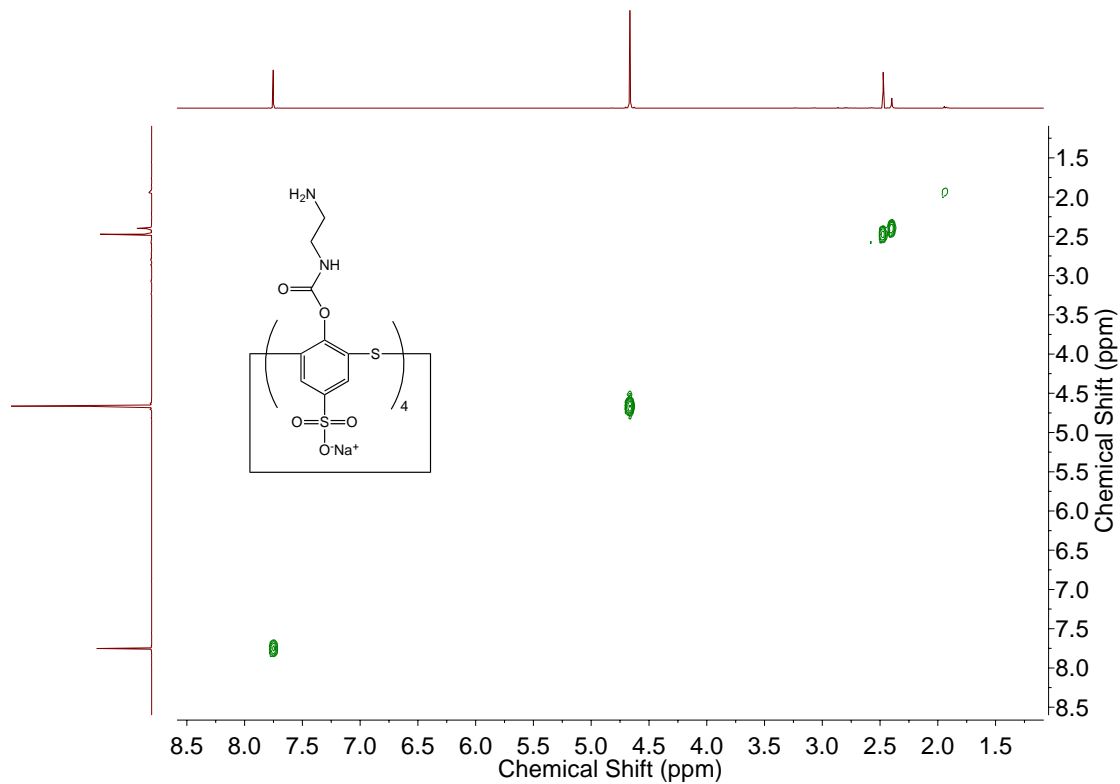

Supplementary Figure 20 |  $2\text{D } ^1\text{H}-^1\text{H}$  COSY NMR spectrum of SC[4]AA (4) in  $\text{D}_2\text{O}$ .

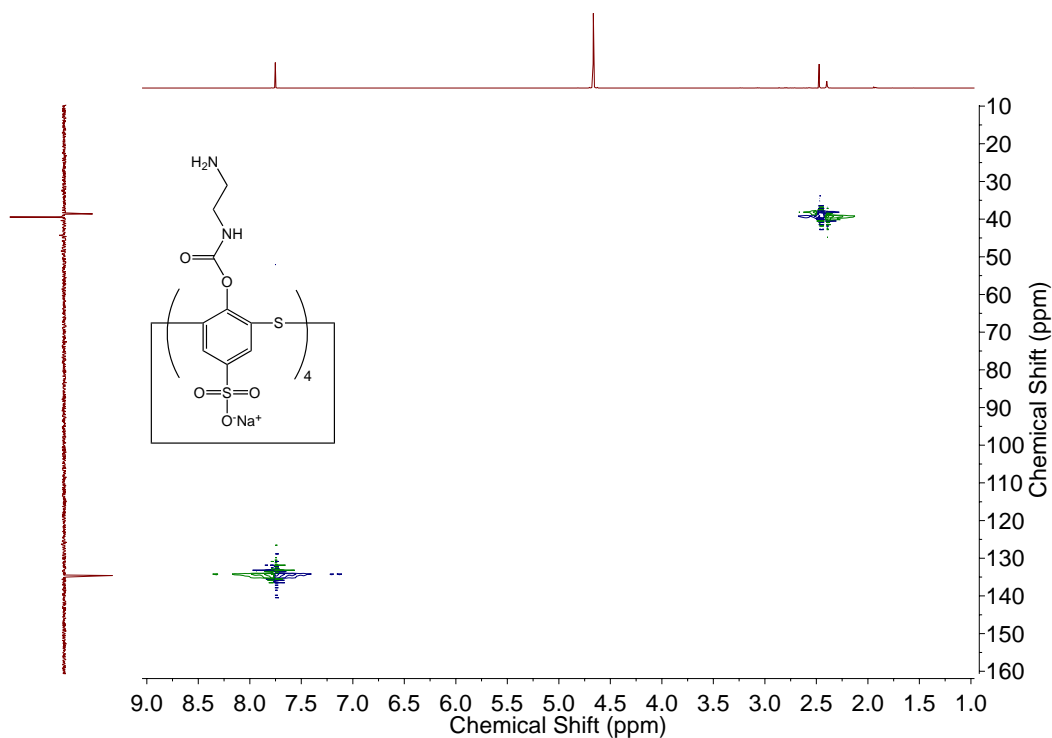

Supplementary Figure 21 | 2D  $^1\text{H}$ - $^{13}\text{C}$  HSQC NMR spectrum of SC[4]AA (4) in  $\text{D}_2\text{O}$ .

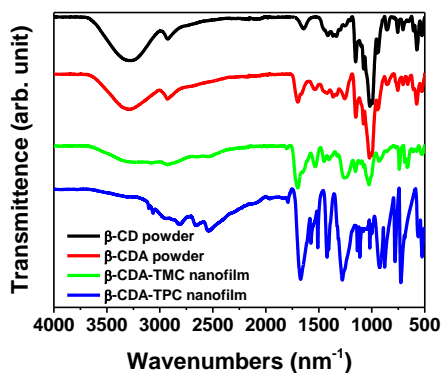

Supplementary Figure 22 | Fourier-transform infrared (FT-IR) spectra of the precursors, amino derivatives, and the resulting nanofilms. These include unfunctionalised  $\beta$ -cyclodextrin ( $\beta$ -CD) powder, synthesized amino-functionalised  $\beta$ -cyclodextrin ( $\beta$ -CDA) powder, and resulting nanofilms ( $\beta$ -CDA-TMC, and  $\beta$ -CDA-TPC) made from 0.1 wt.%  $\beta$ -CDA with 0.1 wt.% trimesoyl chloride (TMC) and 0.1 wt.% terephthaloyl chloride (TPC) respectively.

**Supplementary Table 1.** Functional groups analysed from FT-IR for unfunctionalised  $\beta$ -cyclodextrin ( $\beta$ -CD) powder, amino-functionalised  $\beta$ -cyclodextrin ( $\beta$ -CDA) powder,  $\beta$ -CDA-TMC nanofilm, and  $\beta$ -CDA-TPC nanofilm.

| Wavenumbers ( $\text{cm}^{-1}$ ) –functional group | $\beta$ -CD powder | $\beta$ -CDA powder | $\beta$ -CDA-TMC nanofilm | $\beta$ -CDA-TPC nanofilm |
|----------------------------------------------------|--------------------|---------------------|---------------------------|---------------------------|
| 3290-(O-H) alcohol                                 | √                  | √                   | √                         | √                         |
| 2930-(C-H) alkane                                  | √                  | √                   | √                         | √                         |
| 1800-(C=O) carboxylic acid                         | ×                  | ×                   | √                         | √                         |
| 1700-(C=O) amide                                   | ×                  | √                   | √                         | √                         |
| 1610-(C=C) conjugated alkene                       | ×                  | ×                   | √                         | √                         |
| 1530-(C-N) amide                                   | ×                  | √                   | √                         | √                         |
| 1020-(C-O-C) ether                                 | √                  | √                   | √                         | √                         |

√ indicates the presence of the functional group. × indicates the absence of the functional group.

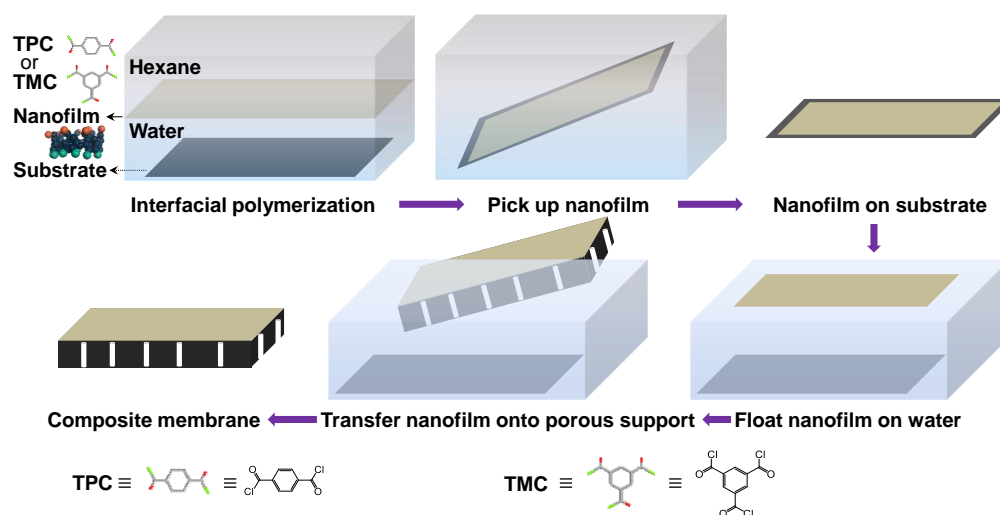

5

**Supplementary Figure 23 | Schematic of interfacial polymerisation at a free interface.** The reaction occurs between an aqueous phase containing amino-functionalised macrocycles and hexane phase containing terephthaloyl chloride (TPC) or trimesoyl chloride (TMC).

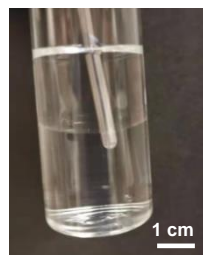

10

**Supplementary Figure 24 | Photograph of the free interface between an aqueous phase containing unfunctionalised  $\beta$ -cyclodextrin and a hexane phase containing terephthaloyl chloride (TPC).** No film was observed at the interface for this combination.

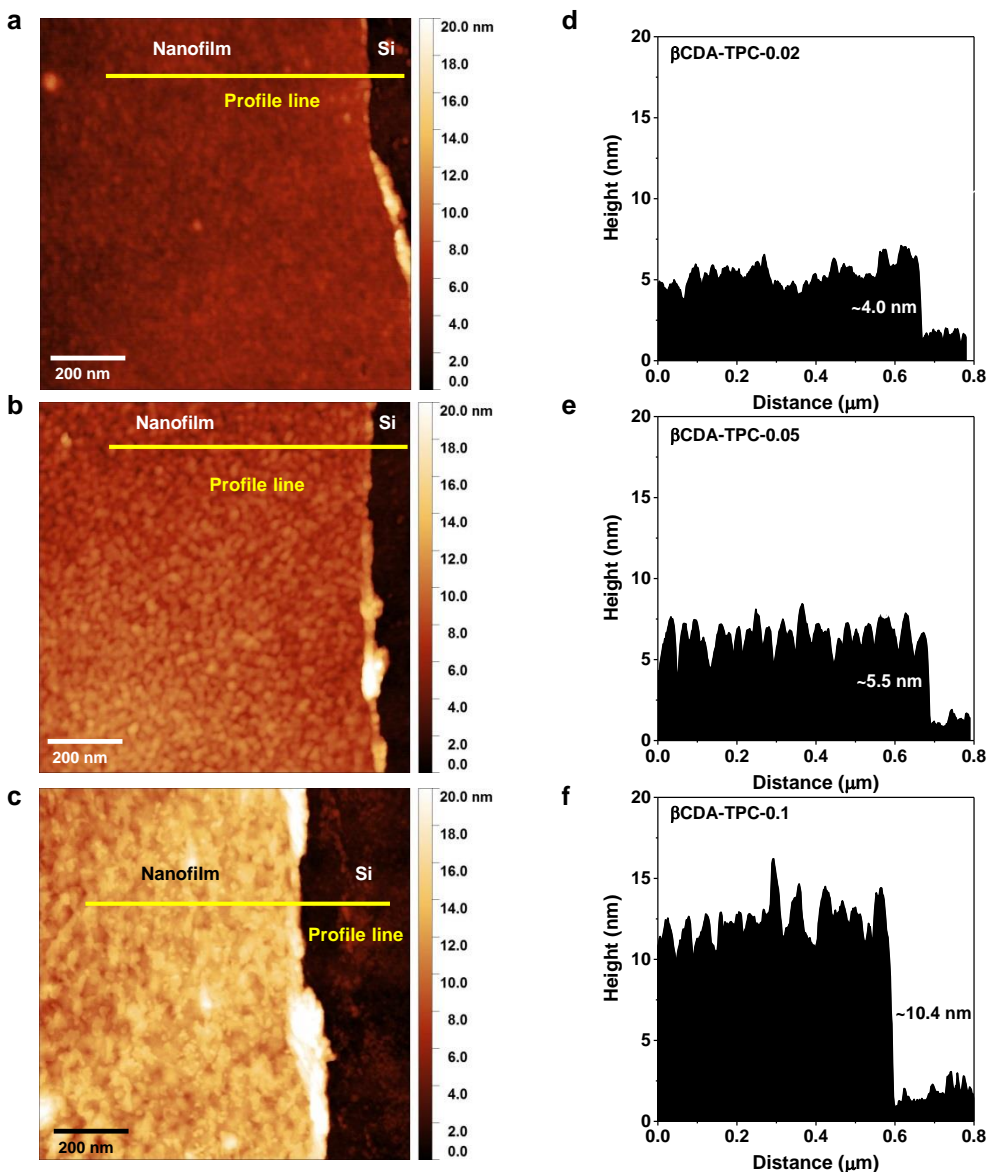

**Supplementary Figure 25 | Atomic force microscopy (AFM) height images of the nanofilms.**

They were made from **a**, 0.02 wt.%, **b**, 0.05 wt.%, and **c**, 0.1 wt.% amino-functionalised  $\beta$ -cyclodextrin ( $\beta$ -CDA) and 0.1 wt.% terephthaloyl chloride (TPC) reacted for 1 min. **d-f**, Height along profile lines for respective nanofilms. The nanofilms were fabricated at the free interface and transferred onto silicon (Si) wafers.

5

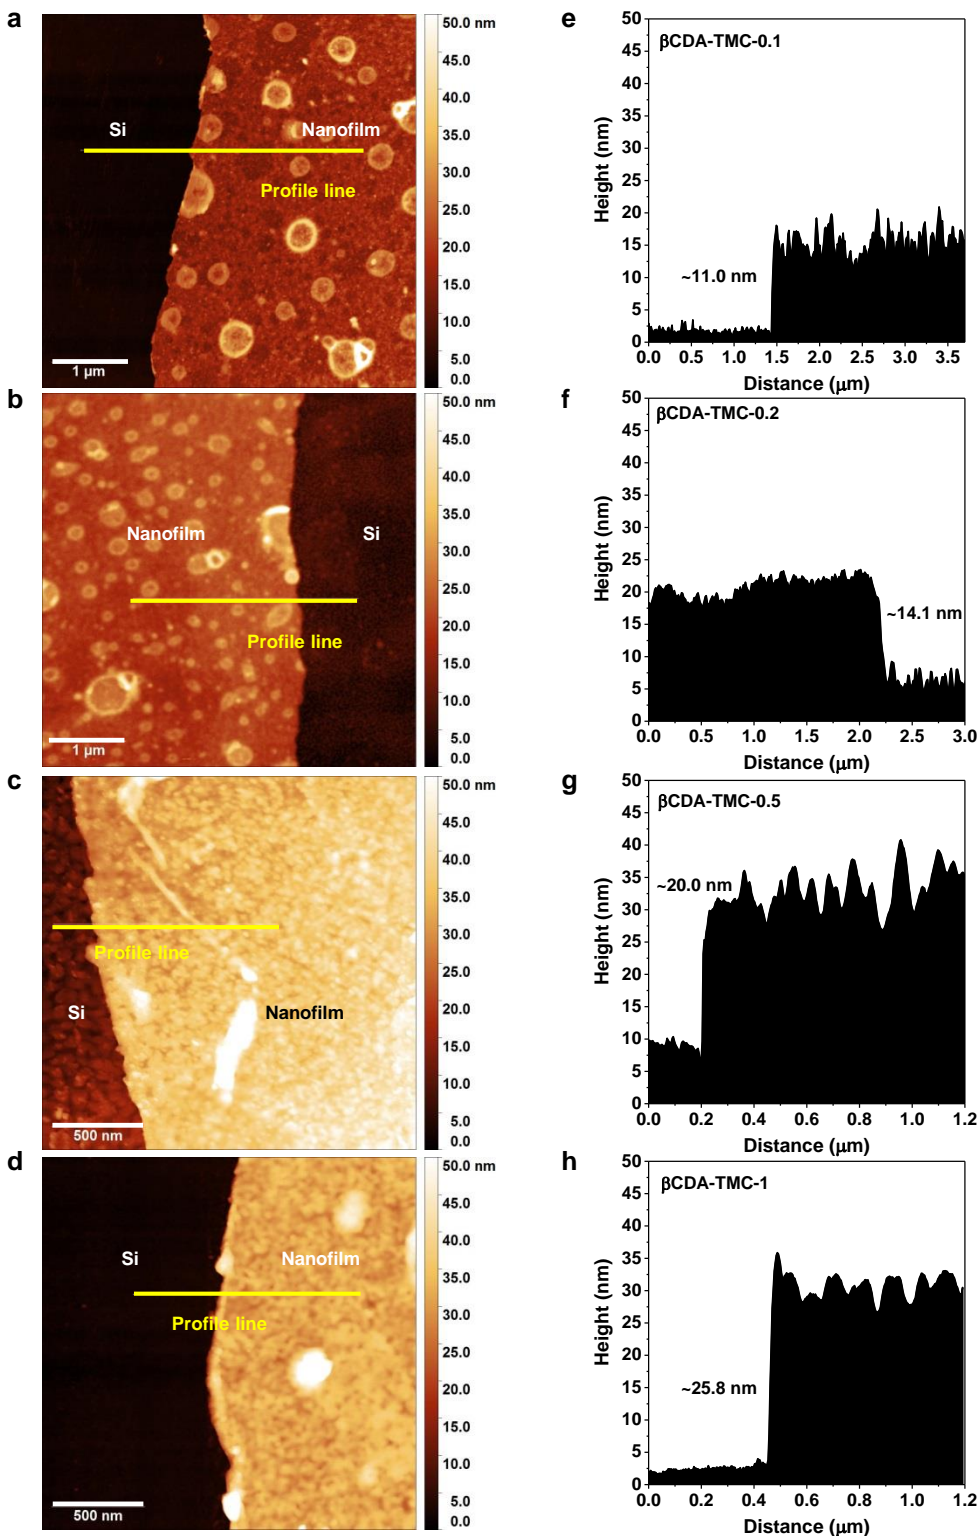

**Supplementary Figure 26 | AFM height image of the nanofilms.** They were made from **a**, 0.1 wt.%, **b**, 0.2 wt.%, **c**, 0.5 wt.%, and **d**, 1.0 wt.% amino-functionalised  $\beta$ -CDA and 0.1 wt.% trimesoyl chloride (TMC) reacted for 1 min. **e-h**, Height along profile lines scanned for respective nanofilms.



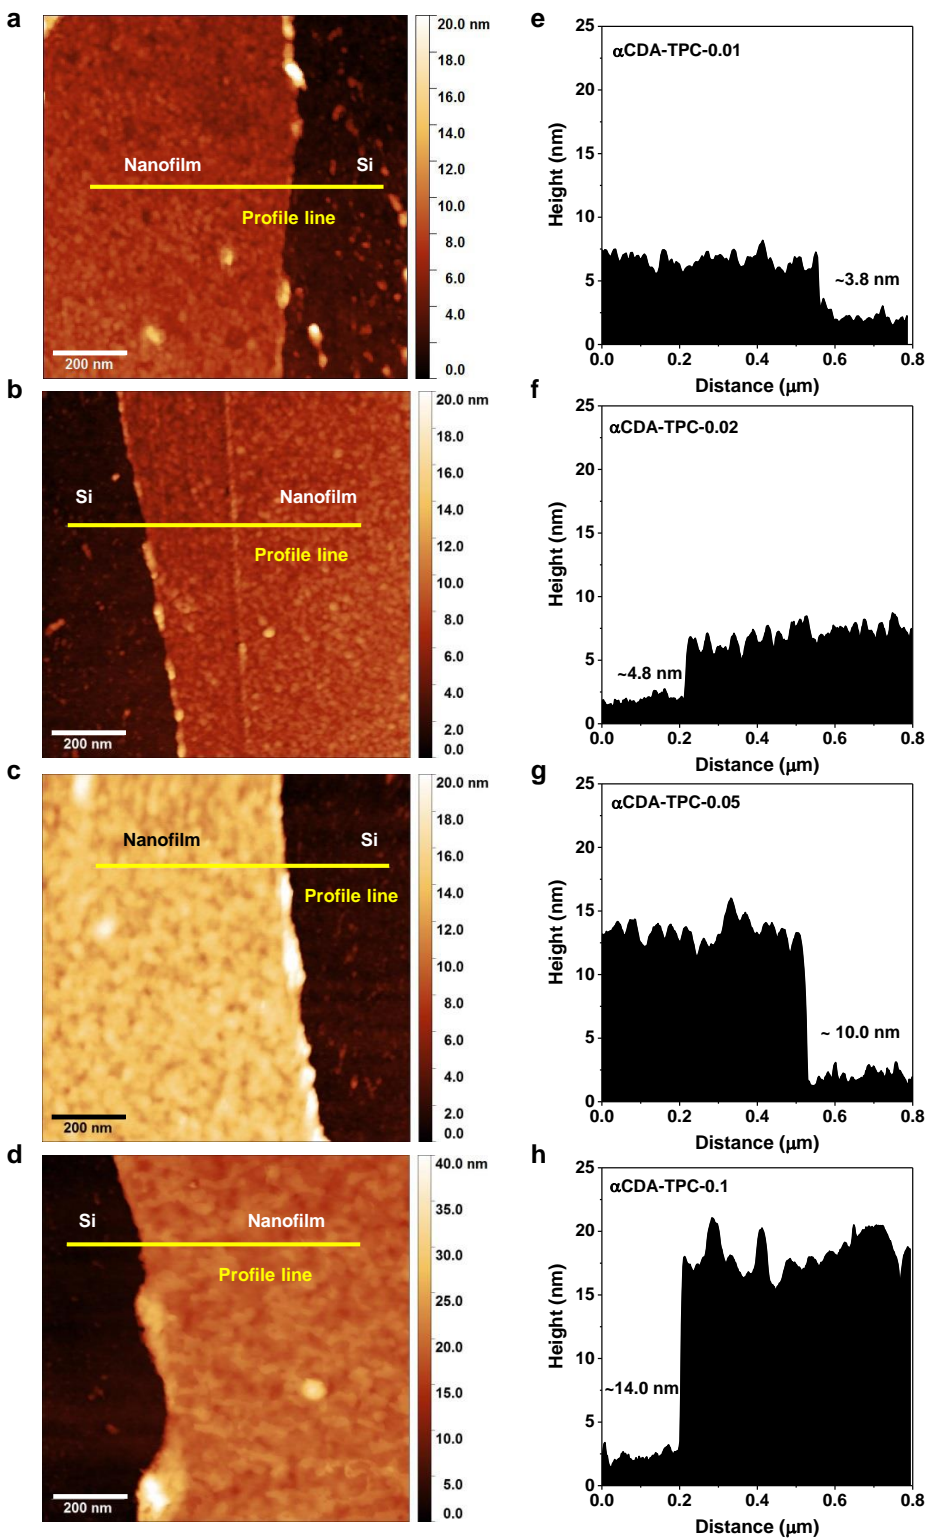

**Supplementary Figure 27 | AFM height image of the nanofilms.** They were made from **a**, 0.01 wt.%, **b**, 0.02 wt.%, **c**, 0.05 wt.%, **d**, 0.1 wt.% amino-functionalised  $\alpha$ -cyclodextrin ( $\alpha$ -CDA) and 0.1 wt.% TPC reacted for 1 min. **e-h**, Height along profile lines scanned for respective nanofilms.

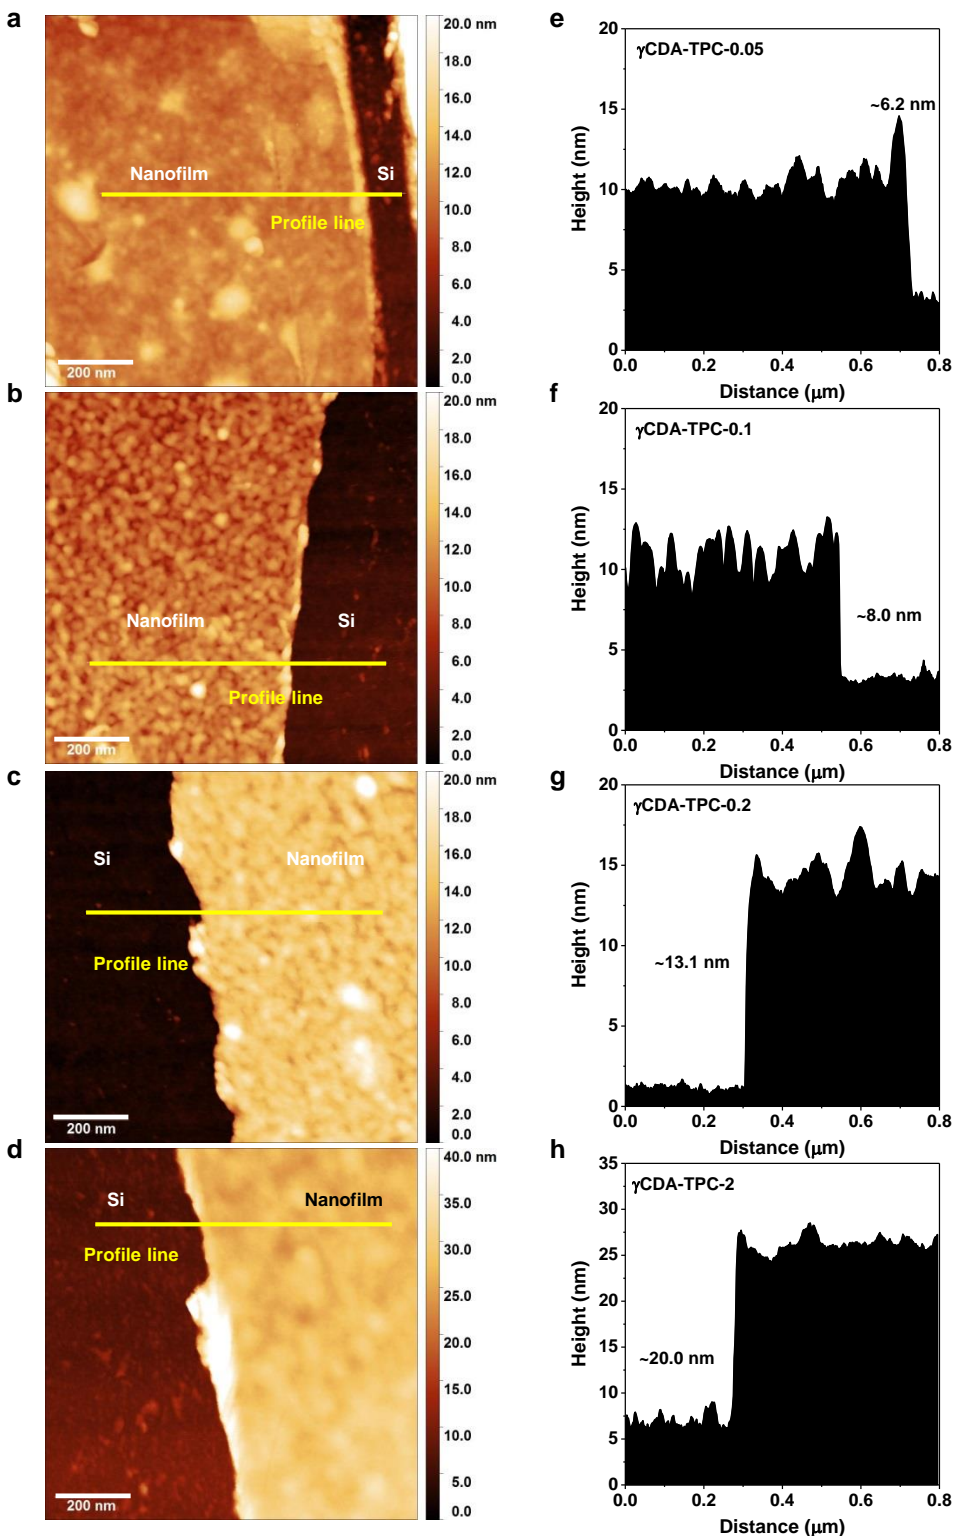

**Supplementary Figure 28 | AFM height image of the nanofilms.** They were made from **a**, 0.05 wt.%, **b**, 0.1 wt.%, **c**, 0.2 wt.%, and **d**, 2 wt.% amino-functionalised  $\gamma$ -cyclodextrin ( $\gamma$ -CDA) and 0.1 wt.% TPC reacted for 1 min. **e-h**, Height along profile lines scanned for respective nanofilms.

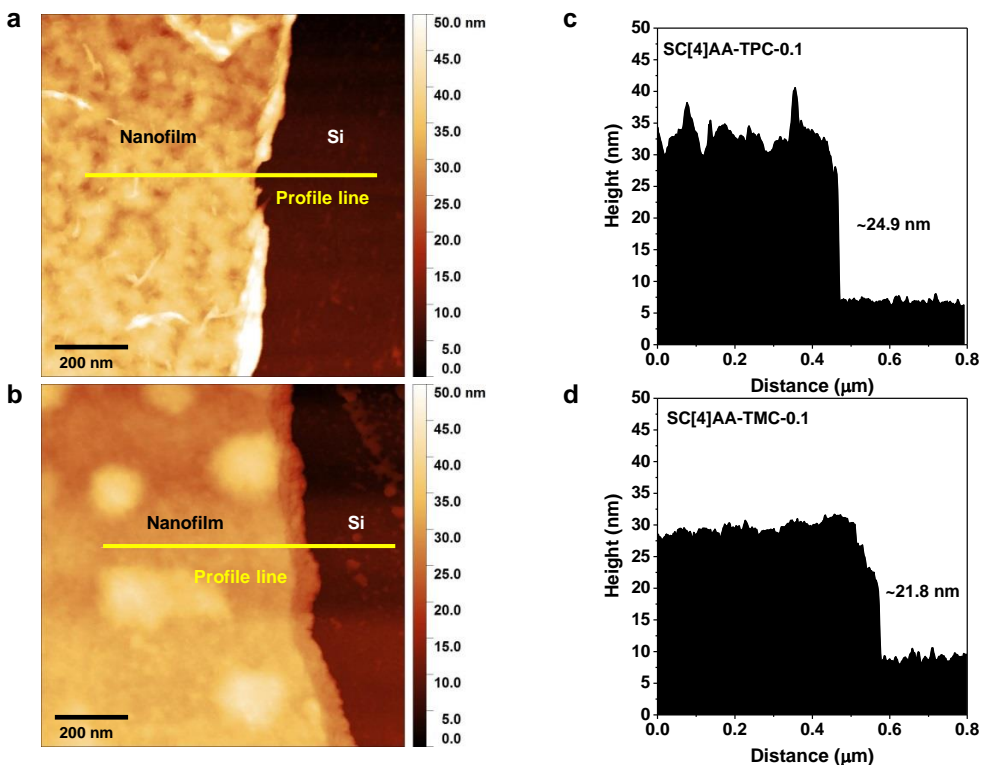

**Supplementary Figure 29 | AFM height image of the nanofilms.** They were made from 0.1 wt.% amino-functionalised 4-sulfocalix[4]arene (SC[4]AA) with **a**, 0.1 wt.% TPC and **b**, 0.1 wt.% TMC reacted for 20 min. **c** and **d**, Height along profile lines scanned for respective nanofilms. The nanofilm thicknesses were one order of magnitude thinner than those fabricated from unfunctionalised precursors<sup>41</sup>.

**Supplementary Table 2.** Upper (narrow) and lower (wide) rim dimensions of macrocycles.

| Property                | $\alpha$ -CDA* | $\beta$ -CDA* | $\gamma$ -CDA* | SC[4]AA <sup>†</sup> |
|-------------------------|----------------|---------------|----------------|----------------------|
| Upper rim diameter (nm) | 0.45           | 0.61          | 0.77           | 0.57                 |
| Lower rim diameter (nm) | 0.57           | 0.78          | 0.95           | 0.57                 |

\*Dimensions adapted from the reported literature<sup>42</sup>. <sup>†</sup>Dimensions from molecular simulation, please refer to Supplementary Figure 48.

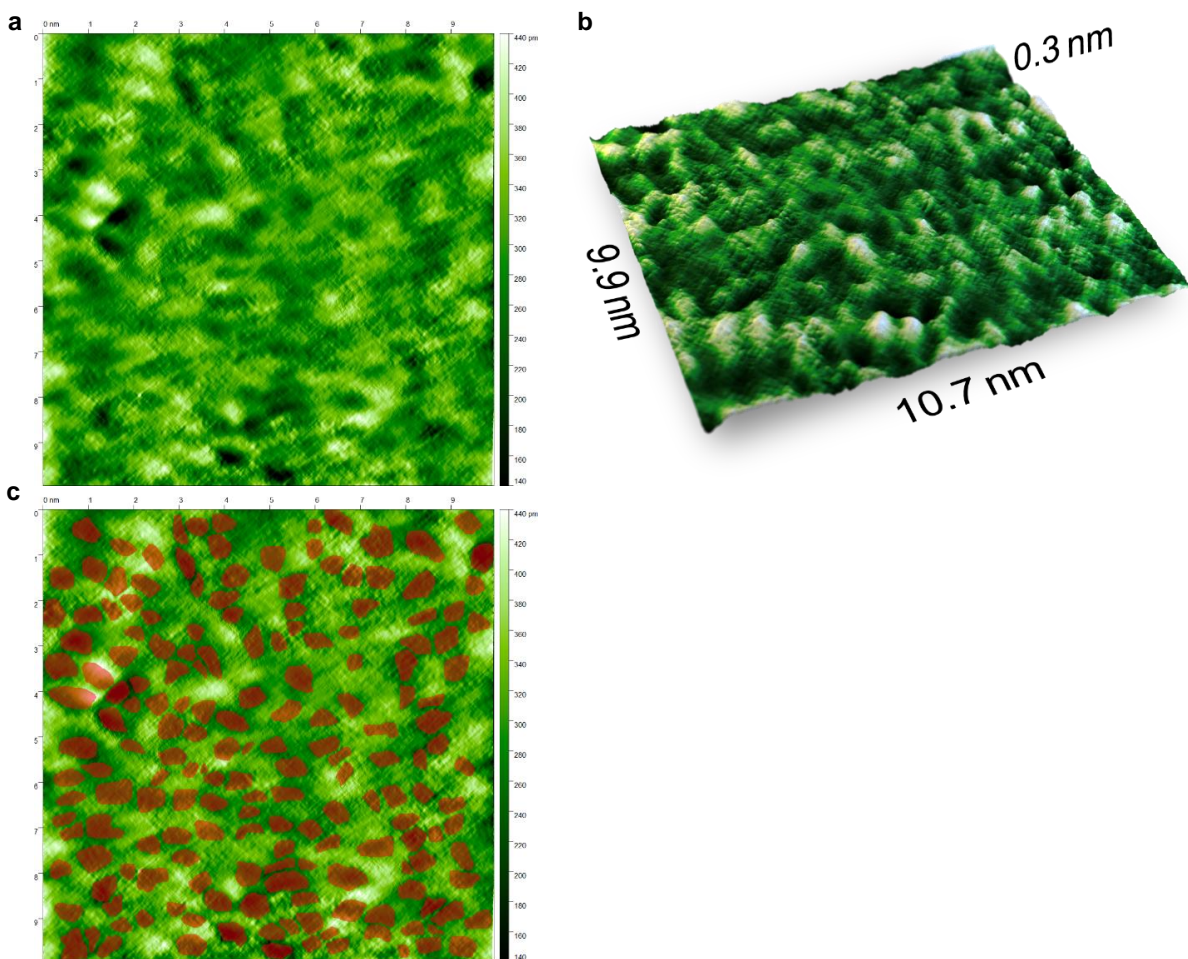

**Supplementary Figure 30 | UHV AFM height images of nanofilms made from medium cavity  $\beta$ -CDA. Original a, 2D, b, 3D images, and c, 2D image with pores being marked.**

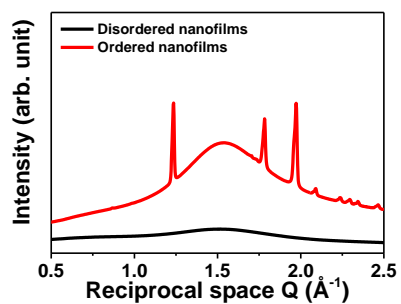

**5 Supplementary Figure 31 | Powder X-ray diffraction of the nanofilm powders. They were made from disordered nanofilms ( $\beta$ -CDA-TMC-0.1) and ordered nanofilms ( $\beta$ -CDA-TPC-0.1).**



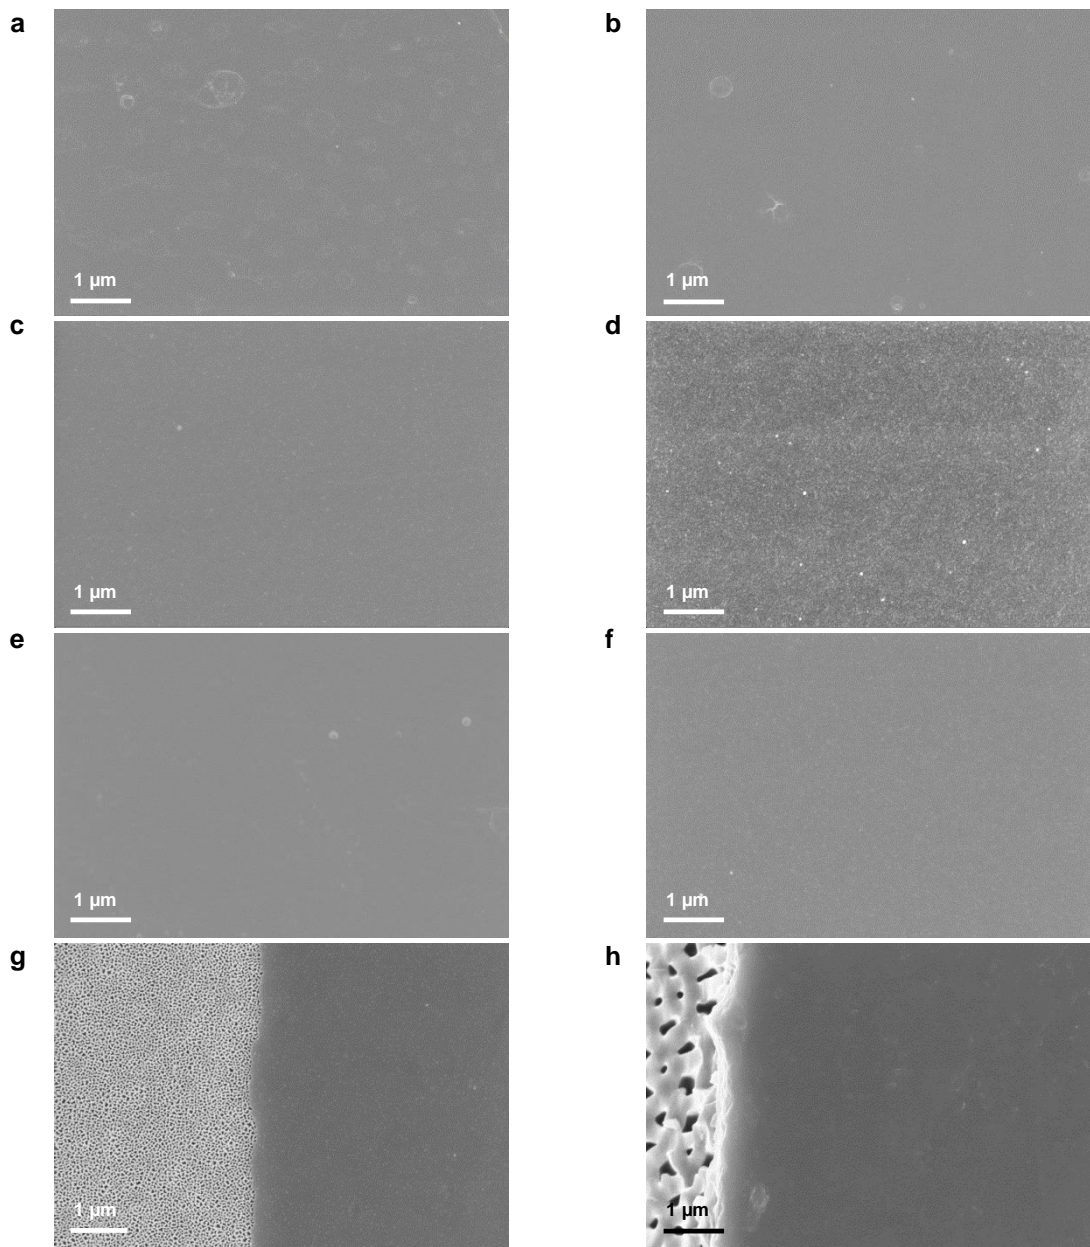

**Supplementary Figure 32 | SEM surface images of the nanofilms.** These include nanofilms ( $\beta$ -CDA-TMC-0.1) made from 0.1 wt.% amino-functionalised  $\beta$ -cyclodextrin ( $\beta$ -CDA) and 0.1 wt.% TMC revealing **a**, the front-surface-up and **b**, the back-surface-up transferred onto PAN supports. SEM images of the nanofilms ( $\beta$ -CDA-TPC-0.1) made from 0.1 wt.%  $\beta$ -CDA and 0.1 wt.% TPC revealing **c**, the front-surface-up and **d**, the back-surface-up transferred onto PAN supports. SEM images of **e**, the nanofilm ( $\beta$ -CDA-TMC-0.05) made from 0.05 wt.%  $\beta$ -CDA and 0.1 wt.% TMC and **f**, the nanofilm ( $\beta$ -CDA-TPC-0.05) made from 0.05 wt.%  $\beta$ -CDA and 0.1 wt.% TPC transferred onto PAN supports. SEM surface images of **g**, the nanofilm ( $\beta$ -CDA-TPC-0.1) made from 0.1 wt.%  $\beta$ -CDA and 0.1 wt.% TPC and **h**, the nanofilm ( $\alpha$ -CDA-TPC-0.1) made from 0.1 wt.%  $\alpha$ -CDA and 0.1 wt.% TPC transferred onto alumina supports.

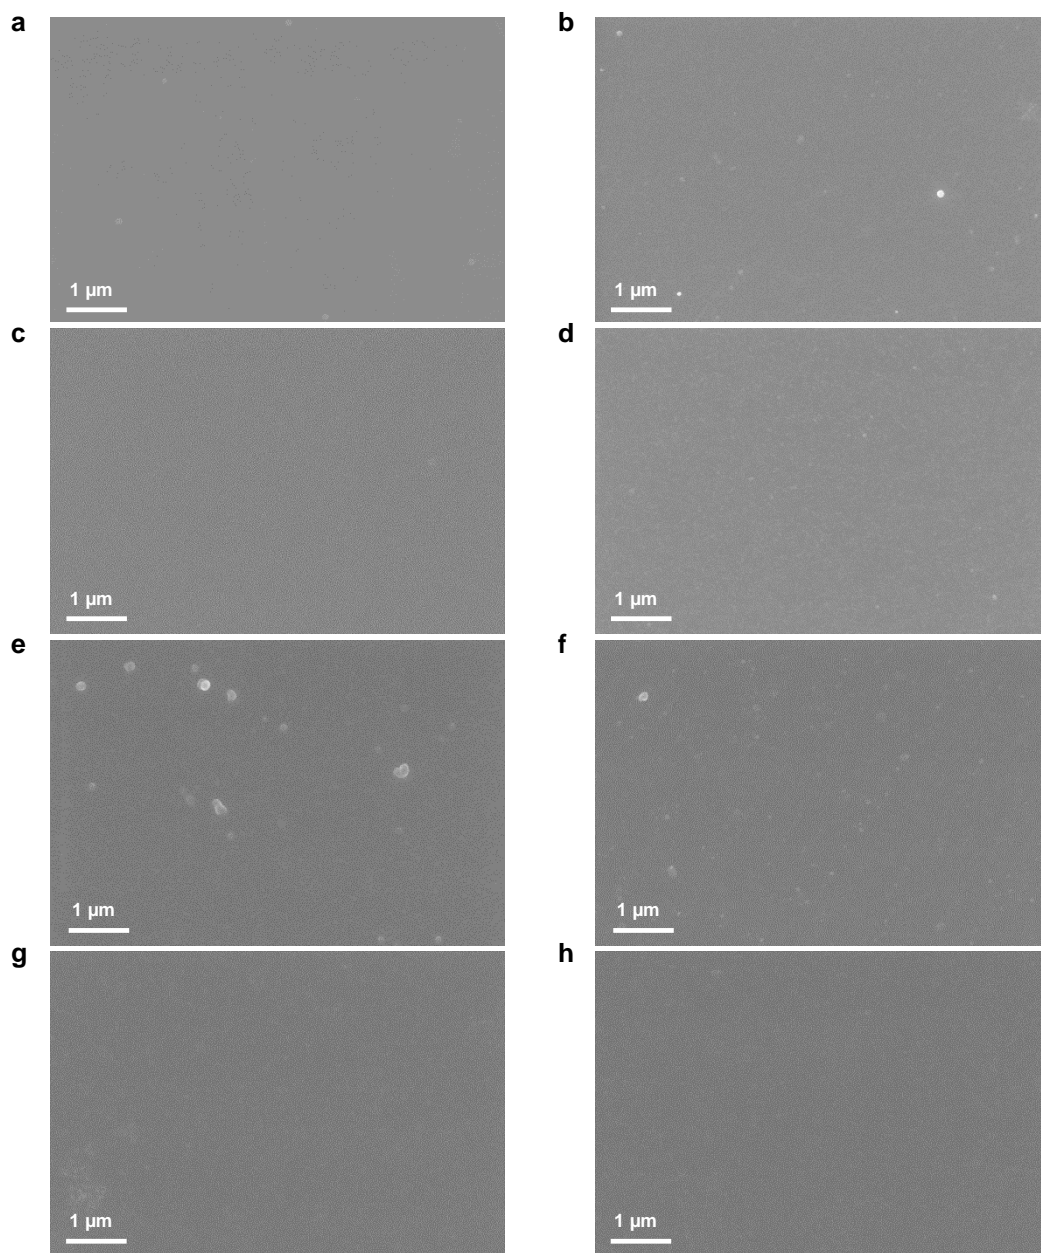

**Supplementary Figure 33 | SEM surface images of the nanofilms.** These include nanofilms made from **a**, 0.05 wt.%  $\alpha$ -CDA ( $\alpha$ -CDA-TPC-0.05), **b**, 0.1 wt.%  $\alpha$ -CDA ( $\alpha$ -CDA-TPC-0.1), **c**, 0.05 wt.%  $\gamma$ -CDA ( $\gamma$ -CDA-TPC-0.05), **d**, 0.1 wt.%  $\gamma$ -CDA ( $\gamma$ -CDA-TPC-0.1), **e**, 0.2 wt.%  $\gamma$ -CDA ( $\gamma$ -CDA-TPC-0.2), and **f**, 2 wt.%  $\gamma$ -CDA ( $\gamma$ -CDA-TPC-2) with 0.1 wt.% terephthaloyl chloride (TPC) reacted for 1 min and transferred onto PAN supports. SEM images of **g**, the nanofilms (SC[4]AA-TPC-0.1) made from 0.1 wt.% amino-functionalised 4-sulfocalix[4]arene (SC[4]AA) reacted with 0.1 wt.% TPC and **h**, the nanofilms (SC[4]AA-TMC-0.1) made from 0.1 wt.% SC[4]AA reacted with 0.1 wt.% TMC for 20 min and transferred onto PAN supports.

5

10

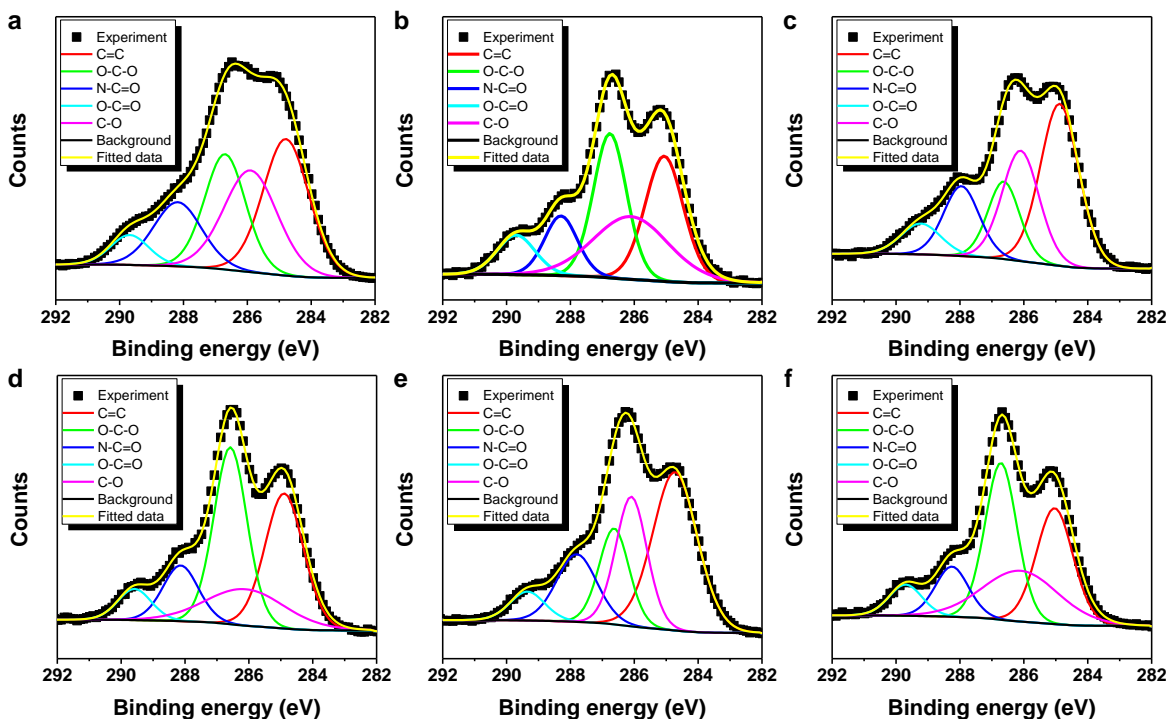

**Supplementary Figure 34 | X-ray photoelectron spectroscopy (XPS) C1s spectrum of the nanofilms.** They were made from **a**, 0.1 wt.% amino-functionalised  $\alpha$ -cyclodextrin ( $\alpha$ -CDA) and terephthaloyl chloride (TPC) ( $\alpha$ -CDA-TPC-0.1), **b**, 0.1 wt.%  $\beta$ -CDA and TPC ( $\beta$ -CDA-TPC-0.1), **c**, 0.1 wt.%  $\beta$ -CDA and trimesoyl chloride (TMC) ( $\beta$ -CDA-TMC-0.1), **d**, 0.1 wt.%  $\gamma$ -CDA and TPC ( $\gamma$ -CDA-TPC-0.1), **e**, 0.2 wt.%  $\gamma$ -CDA and TPC ( $\gamma$ -CDA-TPC-0.2), and **f**, 2 wt.%  $\gamma$ -CDA and TPC ( $\gamma$ -CDA-TPC-2). Concentration of acyl chloride for all nanofilms were controlled at 0.1 wt.%.

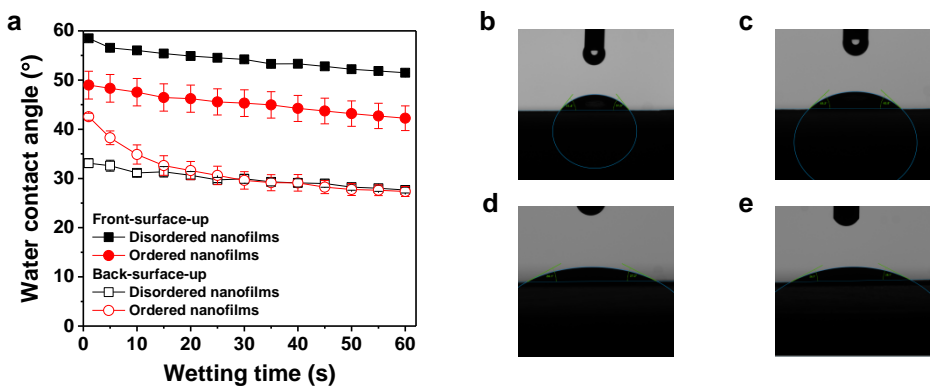

**Supplementary Figure 35 | Water contact angle of disordered nanofilms ( $\beta$ -CDA-TMC-0.1) and ordered nanofilms ( $\beta$ -CDA-TPC-0.1) with their front or back surfaces facing up. **a**, Measurement of water contact angle over wetting time of 60 sec. Photographs of water droplets on the surface of **b**, disordered nanofilms and **c**, ordered nanofilms with front-surface-up, and **d**, disordered nanofilms and **e**, ordered nanofilms with back-surface-up. High water contact angle reveals a more hydrophobic surface that creates potential for fast transport of non-polar solvent.**

**Supplementary Table 3.** Properties of dye molecules used for OSN. Charge 0 denotes neutral charge, - denotes negative charge, and + denotes positive charge.

| Dye molecule name     | Structure                                                                         | Dimension (nm × nm) | Molecular weight (g mol <sup>-1</sup> ) | Charge |
|-----------------------|-----------------------------------------------------------------------------------|---------------------|-----------------------------------------|--------|
| 4-nitrophenol (4NP)   |  | 0.25 × 0.63         | 139                                     | 0      |
| Azobenzene (AZB)      |  | 0.43 × 0.90         | 182                                     | 0      |
| Methyl orange (MO)    |  | 0.51 × 1.5          | 327                                     | -      |
| Safranin O (SO)       |  | 0.73 × 0.97         | 351                                     | +      |
| Congo red (CR)        |  | 0.89 × 2.4          | 696                                     | -      |
| Sunset yellow (SY)    |  | 1.1 × 1.7           | 452                                     | -      |
| Acid fuchsin (ACF)    |  | 1.2 × 1.3           | 585                                     | -      |
| Brilliant blue R (BB) |  | 1.4 × 2.1           | 826                                     | -      |

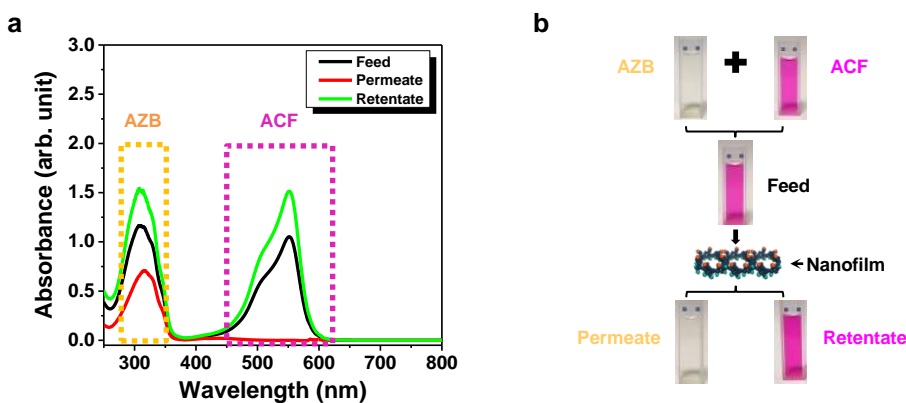

5 **Supplementary Figure 36 | Rejection of a feed mixture containing azobenzene (AZB) and acid fuchsin (ACF) in methanol through  $\beta$ -CDA-TPC-0.1 membrane. a, UV-vis spectra and b, photos of the feed, permeate, and retentate.**

**Supplementary Table 4.** Solubility parameter and viscosity of various solvents.

| Solvent      | Solubility parameter, $\delta$ , (MPa <sup>0.5</sup> )* | Viscosity, $\mu$ , (10 <sup>-3</sup> Pa.s)* |
|--------------|---------------------------------------------------------|---------------------------------------------|
| Water        | 48.0                                                    | 0.89                                        |
| Acetonitrile | 24.6                                                    | 0.32                                        |
| Methanol     | 29.7                                                    | 0.49                                        |
| Acetone      | 20.1                                                    | 0.316                                       |
| Hexane       | 14.4                                                    | 0.297                                       |
| Heptane      | 15.3                                                    | 0.33                                        |
| Toluene      | 18.2                                                    | 0.52                                        |

\*The values were adapted from the literature<sup>2,43</sup>.



**Supplementary Table 5.** Performance of commercial polyamide-based nanofiltration membranes and composite membranes comprising nanofilms made from amino-functionalised macrocycles and acyl chloride at a free interface.

| Membrane<br>(macrocycle-acyl chloride-<br>wt.%-remark) | Pure methanol<br>permeance<br>(L m <sup>-2</sup> h <sup>-1</sup> bar <sup>-1</sup> ) | Dye rejection (%) |                  |                 |                 |                 |                |                 |                |
|--------------------------------------------------------|--------------------------------------------------------------------------------------|-------------------|------------------|-----------------|-----------------|-----------------|----------------|-----------------|----------------|
|                                                        |                                                                                      | 4NP<br>(0.25 nm)  | AZB<br>(0.43 nm) | MO<br>(0.51 nm) | SO<br>(0.73 nm) | CR<br>(0.89 nm) | SY<br>(1.1 nm) | ACF<br>(1.2 nm) | BB<br>(1.4 nm) |
| <i>α</i> -CDA-TPC-0.05                                 | 7.64 ± 0.1                                                                           | 18.0 ± 1.0        | 33.9 ± 0.9       | 93.0 ± 1.2      | 94.0 ± 0.9      | 98.6 ± 0.3      | 97.2 ± 0.6     | 99.4 ± 0.2      | 99.3 ± 0.3     |
| <i>α</i> -CDA-TPC-0.1                                  | 5.75 ± 0.2                                                                           | 8.4 ± 2.5         | 36.2 ± 4.9       | 90.3 ± 0.5      | 95.8 ± 0.8      | 99.3 ± 0.1      | 99.0 ± 0.1     | 99.5 ± 0.4      | 99.3 ± 0.3     |
| <i>α</i> -CDA-TPC-0.1-AI <sup>*</sup>                  | 9.51 ± 0.3                                                                           | 9.8 ± 1.5         | 18.3 ± 3.4       | 91.3 ± 1.2      | 96.3 ± 2.0      | 99.6 ± 0.2      | 96.0 ± 1.2     | 97.3 ± 1.4      | 99.7 ± 0.1     |
| <i>β</i> -CDA-TPC-0.05                                 | 9.84 ± 0.2                                                                           | 4.7 ± 0.7         | 28.3 ± 2.3       | 81.3 ± 5.2      | 95.5 ± 1.2      | 98.3 ± 0.3      | 98.3 ± 0.5     | 99.8 ± 0.1      | 99.6 ± 0.1     |
| <i>β</i> -CDA-TPC-0.1                                  | 6.26 ± 0.4                                                                           | 10.6 ± 0.3        | 27.7 ± 0.3       | 75.1 ± 3.9      | 96.2 ± 0.8      | 98.6 ± 0.4      | 96.0 ± 0.3     | 99.4 ± 0.3      | 99.8 ± 0.1     |
| <i>β</i> -CDA-TPC-0.1-back <sup>†</sup>                | 10.4 ± 0.8                                                                           | 9.2 ± 1.7         | 23.8 ± 2.5       | 72.0 ± 4.0      | 90.7 ± 1.3      | 98.8 ± 0.5      | 94.4 ± 2.3     | 99.0 ± 0.3      | 98.5 ± 0.5     |
| <i>β</i> -CDA-TPC-0.1-AI <sup>*</sup>                  | 11.9 ± 0.4                                                                           | 15.6 ± 0.8        | 26.4 ± 1.6       | 83.2 ± 5.3      | 96.5 ± 2.1      | 98.3 ± 1.2      | 96.0 ± 1.7     | 99.7 ± 0.1      | 99.5 ± 0.1     |
| <i>β</i> -CDA-TPC-2-direct <sup>‡</sup>                | 1.14 ± 0.1                                                                           | 42.1 ± 2.7        | 63.6 ± 3.1       | 92.6 ± 2.4      | 94.7 ± 3.3      | 99.0 ± 0.3      | 98.5 ± 0.7     | 98.0 ± 0.8      | 99.1 ± 0.2     |
| <i>β</i> -CDA-TMC-0.05                                 | 3.91 ± 0.1                                                                           | 6.5 ± 0.5         | 26.9 ± 2.1       | 92.4 ± 1.6      | 92.2 ± 1.2      | 98.4 ± 0.3      | 95.8 ± 0.9     | 98.2 ± 0.5      | 98.5 ± 0.6     |
| <i>β</i> -CDA-TMC-0.1                                  | 3.00 ± 0.5                                                                           | 10.0 ± 0.7        | 16.5 ± 2.1       | 93.0 ± 1.5      | 98.0 ± 0.4      | 99.8 ± 0.1      | 97.2 ± 0.7     | 99.2 ± 0.2      | 99.7 ± 0.1     |
| <i>β</i> -CDA-TMC-0.1-back <sup>†</sup>                | 6.27 ± 0.3                                                                           | 23.2 ± 3.2        | 44.5 ± 2.0       | 93.6 ± 1.3      | 93.4 ± 1.6      | 98.9 ± 0.3      | 98.0 ± 0.4     | 99.0 ± 0.1      | 99.5 ± 0.1     |
| <i>γ</i> -CDA-TPC-0.05                                 | 9.87 ± 0.2                                                                           | 3.6 ± 1.1         | 12.3 ± 0.2       | 57.0 ± 5.3      | 58.2 ± 6.1      | 99.0 ± 0.1      | 91.1 ± 0.8     | 98.0 ± 0.3      | 99.2 ± 0.2     |
| <i>γ</i> -CDA-TPC-0.1                                  | 9.30 ± 0.5                                                                           | 7.4 ± 0.8         | 23.5 ± 4.4       | 60.0 ± 3.6      | 75.7 ± 2.1      | 98.6 ± 1.0      | 94.5 ± 1.6     | 99.7 ± 0.1      | 99.8 ± 0.1     |
| <i>γ</i> -CDA-TPC-0.2                                  | 1.92 ± 0.3                                                                           | 15.2 ± 1.0        | 58.9 ± 0.8       | 91.2 ± 3.7      | 94.6 ± 4.6      | 99.1 ± 0.2      | 96.7 ± 1.8     | 99 ± 0.1        | 99.8 ± 0.1     |
| <i>γ</i> -CDA-TPC-2                                    | 1.61 ± 0.2                                                                           | 40.5 ± 2.0        | 70.2 ± 3.5       | 96.7 ± 1.2      | 98.6 ± 1.0      | 99.0 ± 0.1      | 99.7 ± 0.1     | 99.7 ± 0.2      | 99.9 ± 0.1     |
| SC[4]AA-TPC-0.1 <sup>‡</sup>                           | 3.08 ± 0.4                                                                           | 25.3 ± 1.0        | 48.2 ± 2.3       | 84.3 ± 2.7      | 92.6 ± 0.8      | 94.3 ± 1.0      | 92.9 ± 0.9     | 94.2 ± 2.1      | 98.1 ± 0.7     |
| SC[4]AA-TMC-0.1 <sup>‡</sup>                           | 2.51 ± 0.2                                                                           | 22.7 ± 0.8        | 52.6 ± 1.9       | 95.7 ± 1.3      | 98.6 ± 0.4      | 99.6 ± 0.2      | 99.3 ± 0.1     | 99.6 ± 0.1      | 99.8 ± 0.1     |
| TriSep™ TS40 <sup>**</sup>                             | 8.65 ± 3.0                                                                           | 41.2 ± 1.7        | 48.0 ± 1.4       | 85.4 ± 4.9      | 48.7 ± 1.8      | 83.5 ± 13.5     | 90.9 ± 8.2     | 42.7 ± 12.8     | 45.1 ± 16.6    |
| Suez™ (GE) DK <sup>**</sup>                            | 4.96 ± 0.5                                                                           | 38.2 ± 0.6        | 49.4 ± 6.4       | 93.3 ± 0.6      | 88.6 ± 1.2      | 98.9 ± 0.6      | 97.6 ± 0.5     | 75.8 ± 8.4      | 60.3 ± 29.6    |
| Synder Filtration™ NDX <sup>**</sup>                   | 2.55 ± 0.3                                                                           | 49.4 ± 3.4        | 71.9 ± 5.0       | 96.3 ± 2.4      | 97.6 ± 0.7      | 98.6 ± 1.4      | 97.8 ± 2.1     | 95.7 ± 1.7      | 97.5 ± 0.5     |

Unless specified otherwise, nanofilms were made from amino-functionalised macrocycles and acyl chloride via interfacial polymerisation at a free interface reacted for 1 min and then transferred with the front surface facing up onto PAN supports to form composite membranes. <sup>\*</sup>Nanofilms were transferred onto alumina supports to create composite membranes. <sup>†</sup>Nanofilms were flipped over and transferred with the back surface facing up (back-surface-up) onto the supports. <sup>‡</sup>Nanofilms were directly made on PAN supports via conventional interfacial polymerization. <sup>§</sup>Nanofilms were fabricated via interfacial reaction for 20 min. <sup>\*\*</sup>Commercial polyamide-based nanofiltration membranes. All experiments were carried out in a dead-end filtration cell at a constant pressure 10 bar and a constant temperature 25 °C under constant stirring at 250 rpm. Dye concentrations were maintained at 20 mg L<sup>-1</sup> throughout all experiments.

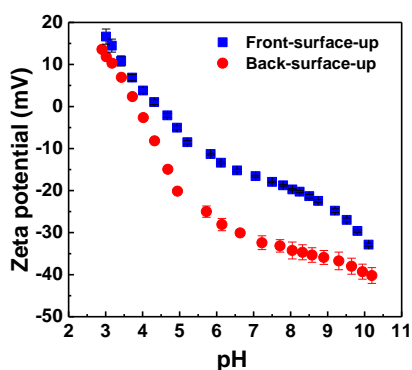

Supplementary Figure 37 | Zeta potential of the front and back surfaces of the  $\beta$ -CDA-TMC-0.1 nanofilm.

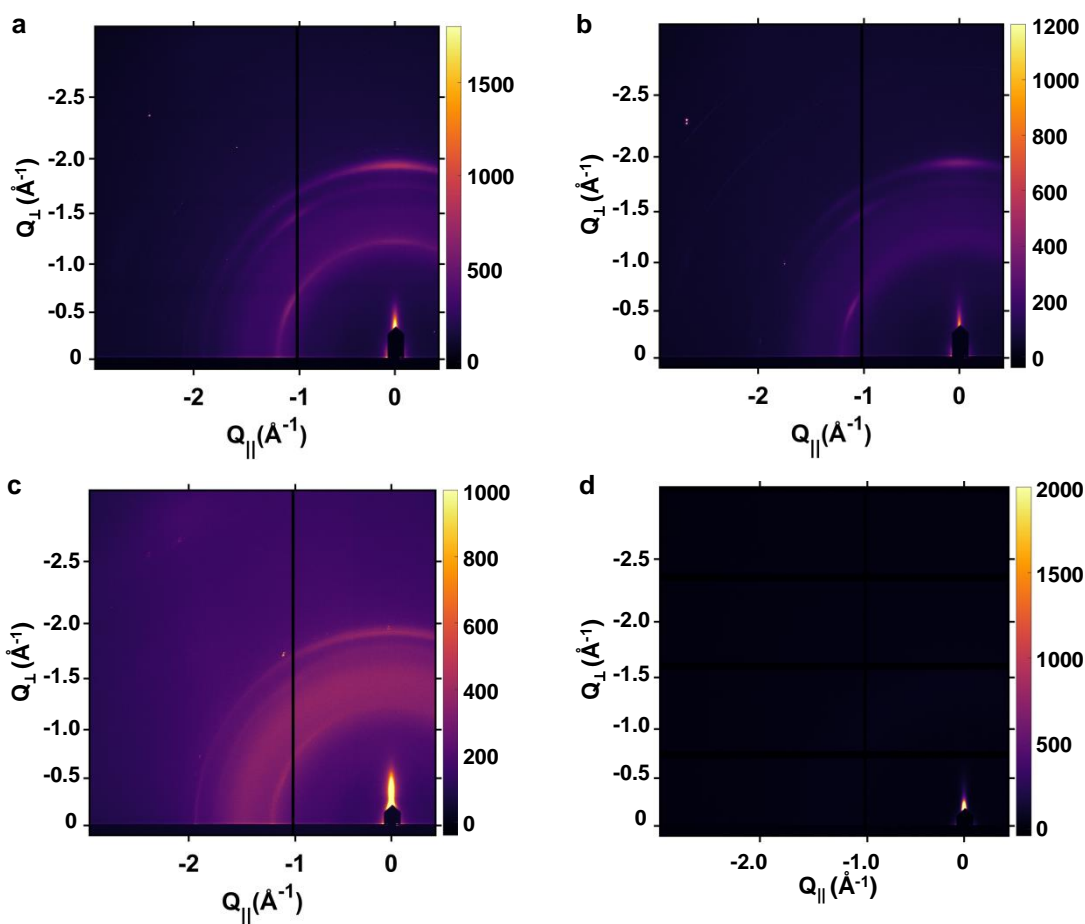

5 **Supplementary Figure 38 | GI-WAXS images of the nanofilms.** Two-dimensional images of nanofilms made from increasing  $\gamma$ -CDA concentrations **a**, 0.05 wt.%  $\gamma$ -CDA ( $\gamma$ -CDA-TPC-0.05), **b**, 0.1 wt.%  $\gamma$ -CDA ( $\gamma$ -CDA-TPC-0.1), **c**, 0.2 wt.%  $\gamma$ -CDA ( $\gamma$ -CDA-TPC-0.2), and **d**, 2 wt.%  $\gamma$ -CDA ( $\gamma$ -CDA-TPC-2) with 0.1 wt.% terephthaloyl chloride (TPC). The corresponding one-dimensional image is shown in Fig. 3e in the main text.

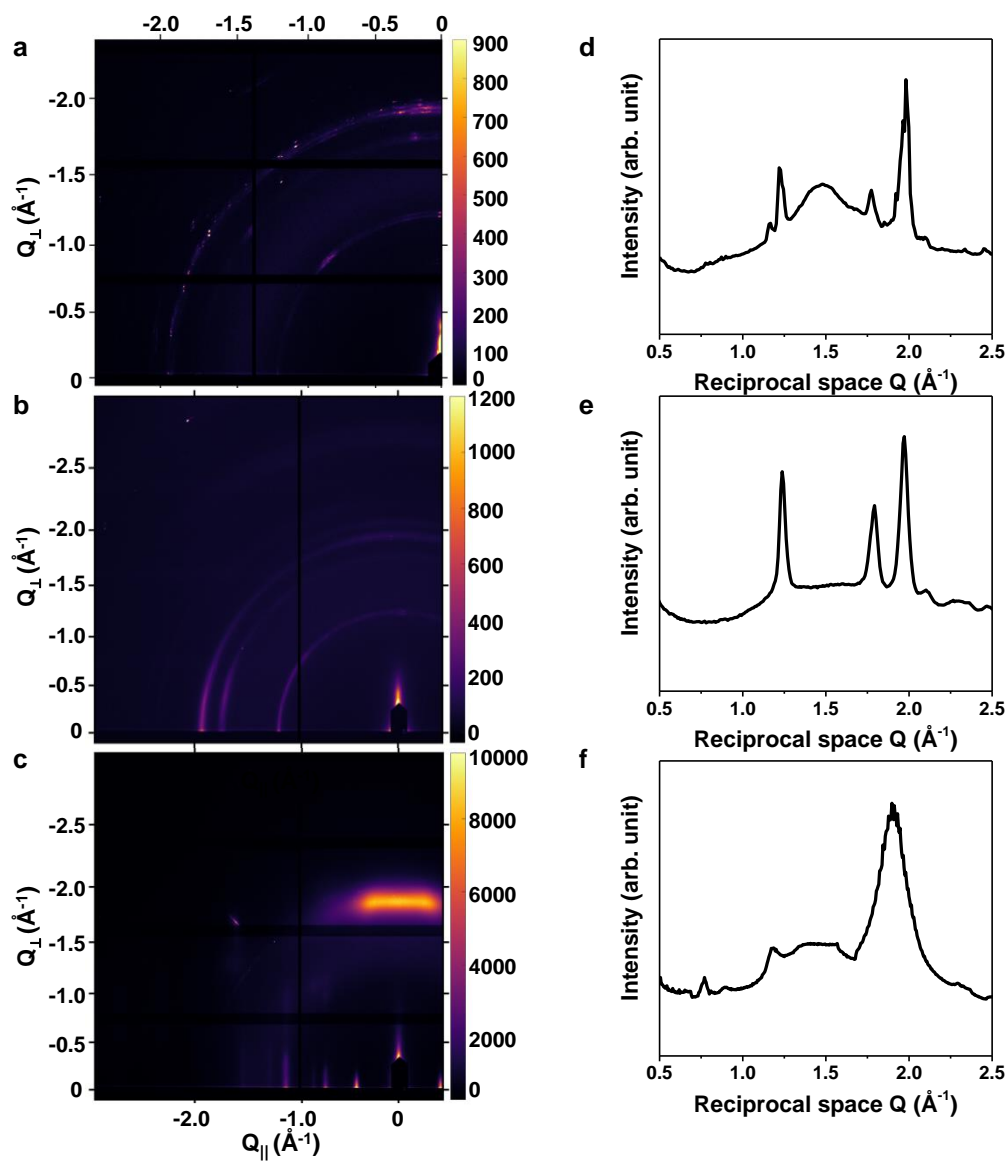

**Supplementary Figure 39 | GI-WAXS images of the nanofilms.** Two dimensional images of nanofilms made **a**, 0.01 wt.%  $\alpha$ -CDA ( $\alpha$ -CDA-TPC-0.01) and **b**, 0.01 wt.%  $\gamma$ -CDA ( $\gamma$ -CDA-TPC-0.01) with 0.1 wt.% TPC, and **c**, 0.01 wt.%  $\beta$ -CDA with 0.1 wt.% TMC ( $\beta$ -CDA-TMC-0.01). **d-f**, GI-WAXS one-dimensional images of the nanofilms in a-c respectively.

5

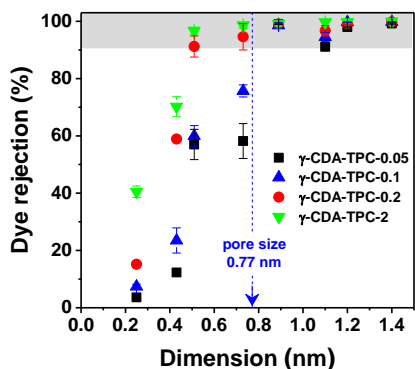

**Supplementary Figure 40 | Dye rejections of the composite membranes.** They comprise nanofilms made from various concentrations of  $\gamma$ -CDA with constant 0.1 wt.% TPC.

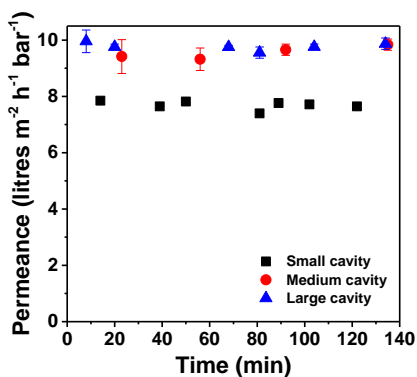

5 **Supplementary Figure 41 | Pure methanol permeance of the composite membranes.** They comprise nanofilms made from small cavity ( $\alpha$ -CDA-TPC), medium cavity ( $\beta$ -CDA-TPC), and large cavity ( $\gamma$ -CDA-TPC) at constant concentrations of 0.05 wt.% CDA and 0.1 wt.% TPC reacted for 1 min, and transferred onto PAN supports.

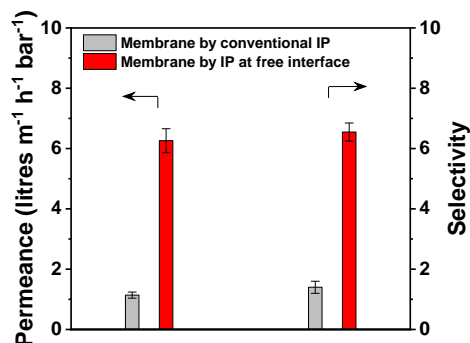

10 **Supplementary Figure 42 | Comparison of performance for composite membranes.** They comprise nanofilms made by conventional interfacial polymerisation (IP) directly on supports and by IP at free interface ( $\beta$ -CDA-TPC-0.1) and subsequently transferred onto supports. Selectivity of solute size 0.51 nm / 0.73 nm is plotted.

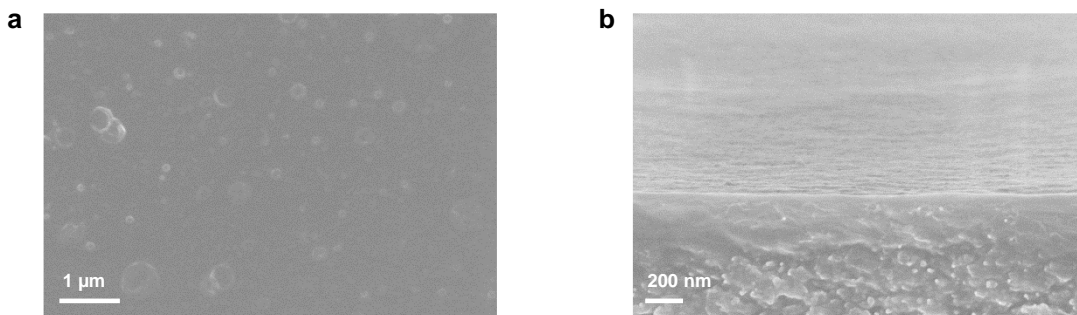

**Supplementary Figure 43 | SEM images of composite membranes fabricated directly on supports by conventional interfacial polymerisation. a, surface, and b, cross sectional images.**

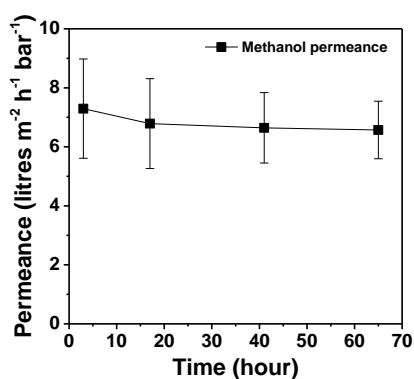

- 5 **Supplementary Figure 44 | Long-term methanol permeance for the composite membranes.** Membranes comprise nanofilms ( $\beta$ -CDA-TPC-0.1) made from 0.1 wt.%  $\beta$ -CDA and 0.1 wt.% TPC and then transferred onto PAN supports. The membranes were tested in a crossflow rig for 3 days at 25 °C under 10 bar with flowrate of 50 L h<sup>-1</sup>.

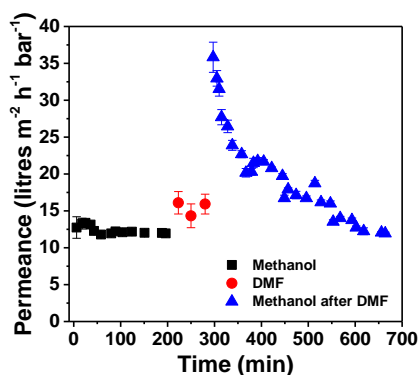

- 10 **Supplementary Figure 45 | Impact of DMF post treatment.** Methanol permeance before and after dimethylformamide (DMF) treatment for the composite membrane comprising nanofilms ( $\beta$ -CDA-TPC-0.1-A1) made from 0.1 wt.%  $\beta$ -CDA and 0.1 wt.% TPC and then transferred onto alumina supports. No activation by DMF was observed for the membrane.

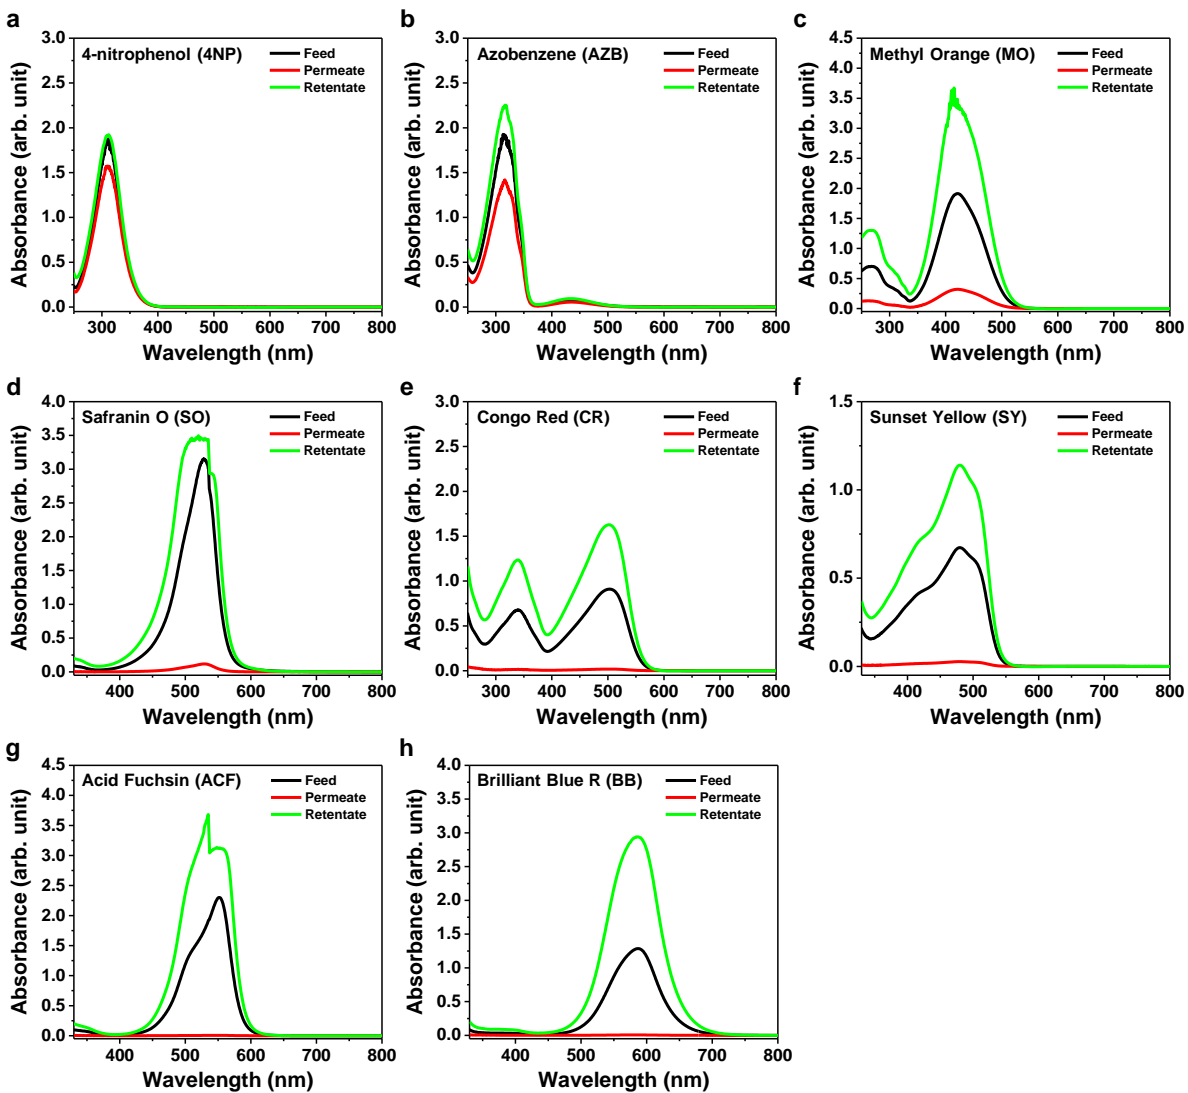

**Supplementary Figure 46 | Typical ultraviolet-visible (UV-vis) absorption spectra of dyes in feed, permeate, and retentate demonstrating the rejection performance of composite membranes.** This membrane comprised nanofilms ( $\beta$ -CDA-TPC-0.1-Al) made from 0.1 wt.%  $\beta$ -CDA and 0.1 wt.% terephthaloyl chloride (TPC) at the free interface for 1 min and then transferred onto alumina supports.

5

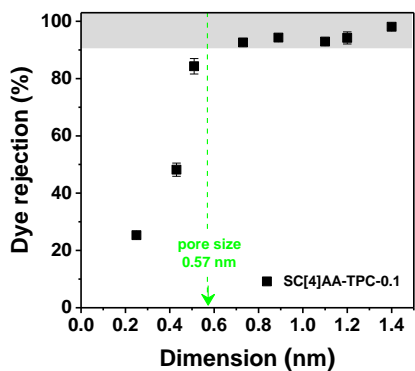

Supplementary Figure 47 | Dye rejections of the composite membranes. They comprise nanofilms made from amino-functionalised 4-sulfocalix[4]arene sodium salt (SC[4]AA) and 0.1 wt.% terephthaloyl chloride (TPC) at the free interface for 20 min and then transferred onto PAN supports.

5

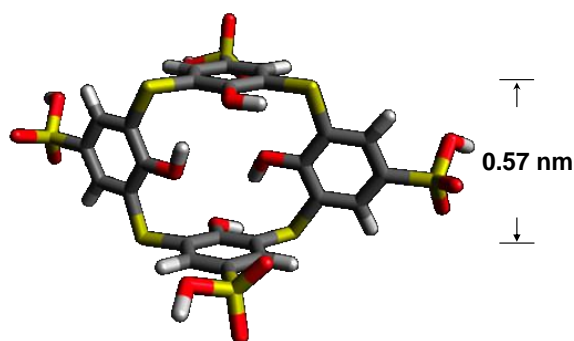

Supplementary Figure 48 | Schematic illustrating the molecular dimensions of amino-functionalised 4-sulfocalix[4]arene sodium salt (SC[4]AA).

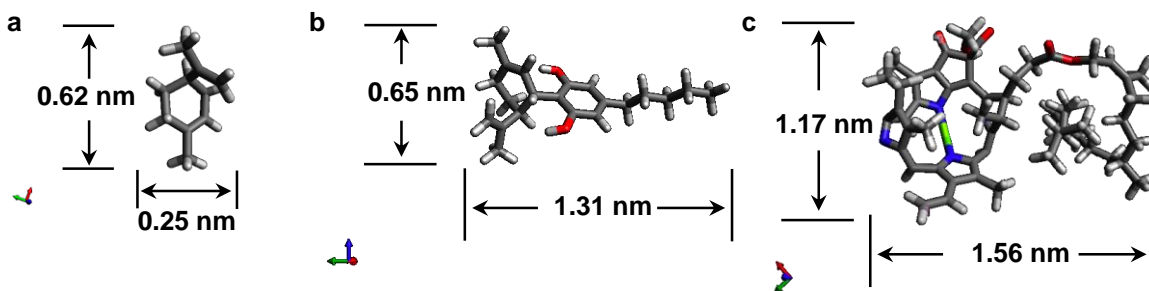

10

Supplementary Figure 49 | Schematic illustrating the molecular dimensions. a, limonene (136 g mol<sup>-1</sup>), b, CBD (314 g mol<sup>-1</sup>), and c, chlorophyll (893 g mol<sup>-1</sup>).

**Supplementary Table 6.** Comparison of selectivity performance between membranes reported in literature and membranes fabricated from amino-functionalised macrocycles in this work.

| Membrane material        | Methanol permeance (L m <sup>-2</sup> h <sup>-1</sup> bar <sup>-1</sup> ) | MW <300 g mol <sup>-1</sup> |               | MW 300-400 g mol <sup>-1</sup> |               | MW 400-500 g mol <sup>-1</sup> |               | Selectivity         |                         | Ref.      |
|--------------------------|---------------------------------------------------------------------------|-----------------------------|---------------|--------------------------------|---------------|--------------------------------|---------------|---------------------|-------------------------|-----------|
|                          |                                                                           | Dye (MW)                    | Rejection (%) | Dye (MW)                       | Rejection (%) | Dye (MW)                       | Rejection (%) | MW<300 / MW 300-400 | MW 300-400 / MW 400-500 |           |
| Cyclodextrin             | 4.9                                                                       |                             |               | MO (327)                       | 67            | IC (466)                       | 88            | -                   | 2.75                    | 8         |
| Trianglamine macrocycle  | 22                                                                        |                             |               | MO (327)                       | 83            | OG (452)                       | 96            | -                   | 4.25                    | 9         |
| COF                      | 72                                                                        | NR (229)                    | 2             | SO (351)                       | 5             | PR (453)                       | 5             | 1.03                | 1.00                    | 13        |
| Cyclodextrin             | 17                                                                        | MR (291)                    | 60            | MO (327)                       | 88            | RBB (442)                      | 95            | 1.58                | 2.40                    | 17        |
| Polyarylate              | 8                                                                         | CSG (249)                   | 70            | DR (314)                       | 90            | CV (408)                       | 97            | 3.00                | 3.33                    | 30        |
| Graphene oxide           | 9                                                                         | HNSA (246)                  | 99.9          | DR (314)                       | 99.9          | CV (408)                       | 99.9          | 1.00                | 1.00                    | 31        |
| Polyimide                | 1.6                                                                       |                             |               | MO (327)                       | 60            | OG (452)                       | 82            | -                   | 2.22                    | 32        |
| Cyclodextrin             | 5.8                                                                       | MR (291)                    | 60            | MO (327)                       | 93            |                                |               | 5.71                | -                       | 7         |
| PIM                      | 8.7                                                                       | SOG (214)                   | 99.9          | DR (314)                       | 99.9          |                                |               | 1.00                | -                       | 33        |
| Conjugated polymers      | 22.5                                                                      | AZB (182)                   | 10.2          | MB (320)                       | 48.4          |                                |               | 1.74                | -                       | 34        |
| $\gamma$ -CDA-TPC-0.1    | 9.30                                                                      |                             |               | MO (327)                       | 60.0          | SY (452)                       | 94.5          | -                   | 7.27                    | This work |
| $\beta$ -CDA-TPC-0.05    | 9.84                                                                      |                             |               | MO (327)                       | 81.3          | SY (452)                       | 98.3          | -                   | 11                      | This work |
| $\alpha$ -CDA-TPC-0.05   | 7.64                                                                      | AZB (182)                   | 33.9          | MO (327)                       | 93.0          |                                |               | -                   | 9.44                    | This work |
| $\alpha$ -CDA-TPC-0.1-AI | 9.51                                                                      | AZB (182)                   | 18.3          | MO (327)                       | 91.3          |                                |               | -                   | 9.39                    | This work |

Abbreviations: MW-molecular weight, COF-covalent organic frameworks, PIM-polymers of intrinsic microporosity, AZB-azobenzene, SOG-sudan orange G, NR-natural red, HNSA-6-hydroxy-2-naphthalenesulfonic acid sodium salt, CSG-chrysoidine G, MR-methyl red sodium salt, DR-disperse red, MB-methylene blue, MO-methyl orange, SO-safranin O, CV-crystal violet, RBB-rhodamine B base, SY-sunset yellow, OG-orange G, PR-primuline, IC-indigo carmine. The molecular weight of each dye was shown in the bracket after the name of the dyes. Selectivity was calculated by following Equation 2.

5

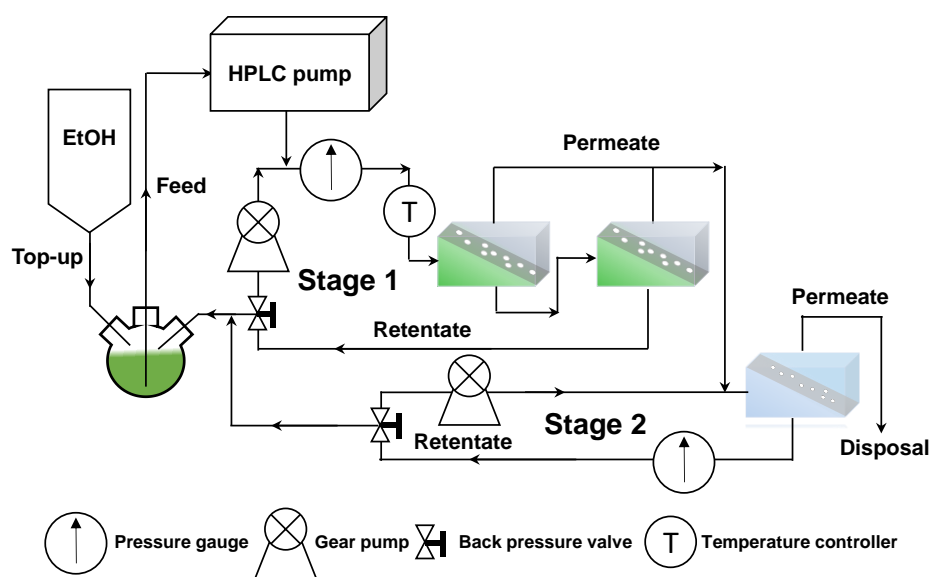

10

**Supplementary Figure 50 | Schematic illustrating a cascade process for enriching CBD.**



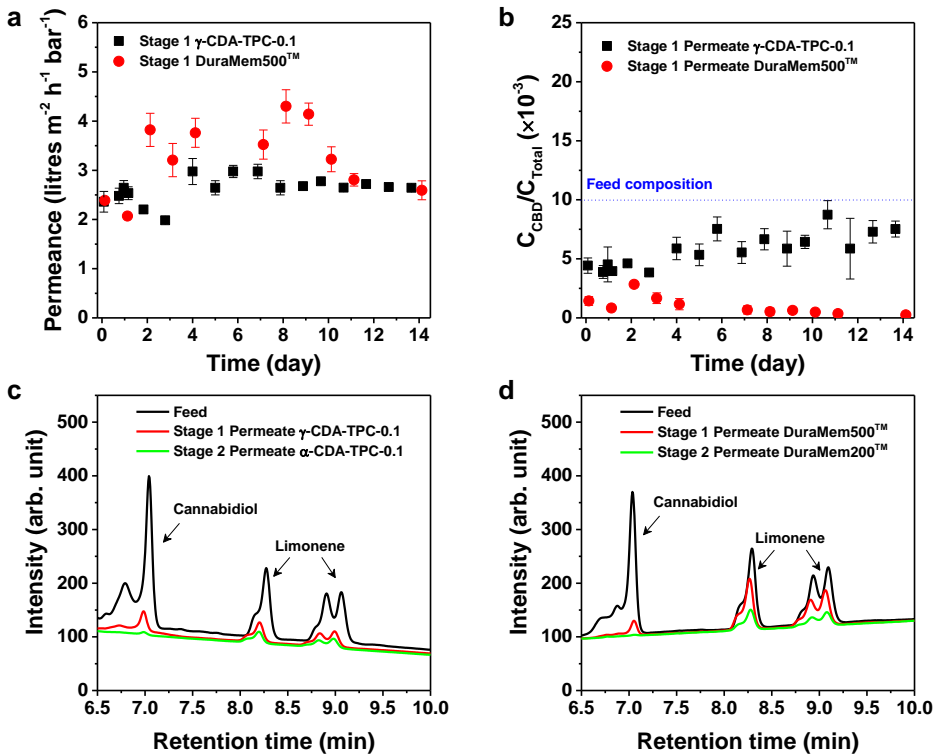

**Supplementary Figure 51 | Performance of cascade process enriching CBD.** **a**, Ethanol permeance and **b**, the concentration of CBD in permeate over time for nanofilms incorporating aligned macrocycle pores ( $\gamma$ -CDA-TPC-0.1) and commercial standard membrane DuraMem500<sup>TM</sup> used in Stage 1. Ultra-violet (UV) absorbance of CBD and limonene from high-performance liquid chromatography (HPLC) for **c**, composite membranes incorporating aligned macrocycle pores versus **d**, commercial membranes. Composite membranes comprising large cavity ( $\gamma$ -CDA-TPC-0.1) and DuraMem500<sup>TM</sup> were used at Stage 1 and composite membranes comprising small cavity ( $\alpha$ -CDA-TPC-0.1) and DuraMem200<sup>TM</sup> were used at Stage 2.

10

## References

41. Zhao, Q. & Liu, Y., Macrocycle crosslinked mesoporous polymers for ultrafast separation of organic dyes. *Chem. Commun.* **54**, 7362-7365 (2018).
42. van de Manakker, F., Vermonden, T., van Nostrum, C. F. & Hennink, W. E., Cyclodextrin-Based Polymeric Materials: Synthesis, Properties, and Pharmaceutical/Biomedical Applications. *Biomacromolecules* **10**, 3157-3175 (2009).
43. Hansen, C. M., *Hansen Solubility Parameters: A User's Handbook* (CRC Press, Boca Raton, FL, ed. 2, 2007).

15
